# Supplementary material
Source: PubMed Central journal article supplement (PMC5783630)
Supplement: EHP1026.s001.acco.pdf [file EHP1026.s001.acco.pdf]

**Note to readers with disabilities:** EHP strives to ensure that all journal content is accessible to all readers. However, some figures and Supplemental Material published in EHP articles may not conform to [508 standards](#) due to the complexity of the information being presented. If you need assistance accessing journal content, please contact [ehp508@niehs.nih.gov](mailto:ehp508@niehs.nih.gov). Our staff will work with you to assess and meet your accessibility needs within 3 working days.

### **Supplemental Material**

#### **Heatwave and mortality: a multi-country multi-community study**

Yuming Guo, Antonio Gasparrini, Ben G. Armstrong, Benjawan Tawatupa, Aurelio Tobias, Eric Lavigne, Micheline de Sousa Zanotti Stagliorio Coelho, Xiaochuan Pan, Ho Kim, Masahiro Hashizume, Yasushi Honda, Yue-Liang Leon Guo, Chang-Fu Wu, Antonella Zanobetti, Joel D. Schwartz, Michelle L. Bell, Matteo Scortichini, Paola Michelozzi, Kornwipa Punnasiri, Shanshan Li, Linwei Tian, Samuel David Osorio Garcia, Xerxes Seposo, Ala Overcenco, Ariana Zeka, Patrick Goodman, Tran Ngoc Dang, Do Van Dung, Fatemeh Mayvaneh, Paulo Hilario Nascimento Saldiva, Gail Williams, and Shilu Tong

#### **Table of Contents**

**Table S1.** Summary of the study periods, number of deaths, and annual average number of heatwaves in 400 communities in 18 countries/regions. HW1: 90th percentile with  $\geq 2$  duration days; HW2: 90th percentile with  $\geq 3$  duration days; HW3: 90th percentile with  $\geq 4$  duration days; HW4: 92.5th percentile with  $\geq 2$  duration days; HW5: 92.5th percentile with  $\geq 3$  duration days; HW6: 92.5th percentile with  $\geq 4$  duration days; HW7: 95th percentile with  $\geq 2$  duration days; HW8: 95th percentile with  $\geq 3$  duration days; HW9: 95th percentile with  $\geq 4$  duration days; HW10: 97.5th percentile with  $\geq 2$  duration days; HW11: 97.5th percentile with  $\geq 3$  duration days; HW12: 97.5th percentile with  $\geq 4$  duration days.

**Table S2.** Second-stage random-effects meta-analysis and meta-regression models for explaining variation in overall heatwave effects and added heatwave effects: Cochran Q test for heterogeneity,  $I^2$  statistics for residual heterogeneity. Please refer table 1 for heatwave definitions.

**Figure S1.** Locations of communities stratified by cold, moderate cold, moderate hot and hot areas, by the quantiles ( $\leq 25$ th, 25th–50th, 50th–75th, and  $> 75$ th) of their mean temperatures of hot season (each community has one value of annual mean temperature).

**Figure S2.** Lag effects of heatwaves on mortality along lag 0–10 days in 18 countries/regions for 4 types of heatwave definitions. 90P\_3day: 90th percentile with  $\geq 3$  days duration; 92.5P\_3day: 92.5th percentile with  $\geq 3$  days duration; 95P\_3day: 95th percentile with  $\geq 3$  days duration; 97.5P\_3day: 97.5th percentile with  $\geq 3$  days duration.

**Figure S3.** Lag effects of heatwaves on mortality along lag 0–10 days in 18 countries/regions for 4 types of heatwave definitions. 90P\_4day: 90th percentile with  $\geq 4$  days duration; 92.5P\_4day: 92.5th percentile with  $\geq 4$  days duration; 95P\_4day: 95th percentile with  $\geq 4$  days duration; 97.5P\_4day: 97.5th percentile with  $\geq 4$  days duration.

**Figure S4.** Comparison for cumulative effects of heatwaves on mortality over lag 0–10 days in 16 countries/regions for 12 types of heatwave definitions using daily mean and minimum temperatures. Please refer table 1 for heatwave definitions. a, B, and  $r^2$  are intercept, coefficient, and r-squared respectively derived from linear regression model for effect estimates modelled by heatwaves defined by daily mean and minimum temperatures. P-value for difference is modelled by the Paired t-test between effect estimates modelled by heatwaves defined by daily mean and minimum temperatures.

**Figure S5.** Cumulative effects of heatwaves (A. definition by maximum temperature and B. definition by minimum temperature) on mortality over lag 0–10 days in 18 countries/regions for 12 types of heatwave definitions. Please refer table 1 for heatwave definitions.

**Figure S6.** Cumulative effects of heatwaves on mortality over lag 0–10 days in 4 climatic areas (cold, moderate cold, moderate hot, and hot areas) for 12 types of heatwave definitions when excluding USA. Cold areas: mean temperature of hot season  $\leq 20.7$  °C; moderate cold areas: mean temperature of hot season 20.7–24.1 °C; moderate hot areas: mean temperature of hot season 24.1–27.6 °C; and hot areas: mean temperature of hot season  $> 27.6$  °C. Please refer table 1 for heatwave definitions.

**Figure S7.** Lag effects of heatwaves on mortality along lag 0–10 days in 4 climatic areas (cold, moderate cold, moderate hot, and hot areas) for 12 types of heatwave definitions when excluding USA. Cold areas: mean temperature of hot season  $\leq 20.7$  °C; moderate cold areas: mean temperature of hot season 20.7–24.1 °C; moderate hot areas: mean temperature of hot season 24.1–27.6 °C; and hot areas: mean temperature of hot season  $> 27.6$  °C. Please refer table 1 for heatwave definitions.

**Figure S8.** Cumulative effects of heatwaves on mortality over lag 0–10 days in 4 climatic areas (cold, moderate cold, moderate hot, and hot areas) for 12 types of heatwave definitions when excluding Italy. Cold areas: mean temperature of hot season  $\leq 20.7$  °C; moderate cold areas: mean temperature of hot season 20.7–24.1 °C; moderate hot areas: mean temperature of hot season 24.1–27.6 °C; and hot areas: mean temperature of hot season  $> 27.6$  °C. Please refer table 1 for heatwave definitions.

**Figure S9.** Lag effects of heatwaves on mortality along lag 0–10 days in 4 climatic areas (cold, moderate cold, moderate hot, and hot areas) for 12 types of heatwave definitions when excluding Italy. Cold areas: mean temperature of hot season  $\leq 20.7$  °C; moderate cold areas: mean temperature of hot season 20.7–24.1 °C; moderate hot areas: mean temperature of hot season 24.1–27.6 °C; and hot areas: mean temperature of hot season  $> 27.6$  °C. Please refer table 1 for heatwave definitions.

**Figure S10.** Cumulative effects of heatwaves on mortality over lag 0–10 days in 4 climatic areas (cold, moderate cold, moderate hot, and hot areas) for 12 types of heatwave definitions when excluding Moldova. Cold areas: mean temperature of hot season  $\leq 20.7$  °C; moderate cold areas: mean temperature of hot season 20.7–24.1 °C; moderate hot areas: mean temperature of hot season 24.1–27.6 °C; and hot areas: mean temperature of hot season  $> 27.6$  °C. Please refer table 1 for heatwave definitions.

**Figure S11.** Lag effects of heatwaves on mortality along lag 0–10 days in 4 climatic areas (cold, moderate cold, moderate hot, and hot areas) for 12 types of heatwave definitions when excluding Moldova. Cold areas: mean temperature of hot season  $\leq 20.7$  °C; moderate cold areas: mean temperature of hot season 20.7–24.1 °C; moderate hot areas: mean temperature of hot season 24.1–27.6 °C; and hot areas: mean temperature of hot season  $> 27.6$  °C. Please refer table 1 for heatwave definitions.

**Figure S12.** Cumulative effects of heatwaves on mortality over lag 0–10 days in 4 climatic areas (cold, moderate cold, moderate hot, and hot areas) for 12 types of heatwave definitions when excluding Vietnam. Cold areas: mean temperature of hot season  $\leq 20.7$  °C; moderate cold areas: mean temperature of hot season 20.7–24.1 °C; moderate hot areas: mean temperature of hot season 24.1–27.6 °C; and hot areas: mean temperature of hot season  $> 27.6$  °C. Please refer table 1 for heatwave definitions.

**Figure S13.** Lag effects of heatwaves on mortality along lag 0–10 days in 4 climatic areas (cold, moderate cold, moderate hot, and hot areas) for 12 types of heatwave definitions when excluding Vietnam. Cold areas: mean temperature of hot season  $\leq 20.7$  °C; moderate cold areas: mean temperature of hot season 20.7–24.1 °C; moderate hot areas: mean temperature of hot season 24.1–27.6 °C; and hot areas: mean temperature of hot season  $> 27.6$  °C. Please refer table 1 for heatwave definitions.

**Figure S14.** Cumulative effects of heatwaves on mortality over lag 0–10 days after controlling for temperature variability (standard deviation of 10 days' daily mean temperatures) in 18 countries/regions for 12 types of heatwave definitions. Please refer table 1 for heatwave definitions.

Table S1: Summary of the study periods, number of deaths, and annual average number of heatwaves in 400 communities in 18 countries/regions. HW1: 90<sup>th</sup> percentile with  $\geq 2$  duration days; HW2: 90<sup>th</sup> percentile with  $\geq 3$  duration days; HW3: 90<sup>th</sup> percentile with  $\geq 4$  duration days; HW4: 92.5<sup>th</sup> percentile with  $\geq 2$  duration days; HW5: 92.5<sup>th</sup> percentile with  $\geq 3$  duration days; HW6: 92.5<sup>th</sup> percentile with  $\geq 4$  duration days; HW7: 95<sup>th</sup> percentile with  $\geq 2$  duration days; HW8: 95<sup>th</sup> percentile with  $\geq 3$  duration days; HW9: 95<sup>th</sup> percentile with  $\geq 4$  duration days; HW10: 97.5<sup>th</sup> percentile with  $\geq 2$  duration days; HW11: 97.5<sup>th</sup> percentile with  $\geq 3$  duration days; HW12: 97.5<sup>th</sup> percentile with  $\geq 4$  duration days.

| Community              | Period    | Number of death | Heatwave type |      |      |      |      |     |     |      |      |       |       |       |
|------------------------|-----------|-----------------|---------------|------|------|------|------|-----|-----|------|------|-------|-------|-------|
|                        |           |                 | HW 1          | HW 2 | HW 3 | HW 4 | HW 5 | HW6 | HW7 | HW 8 | HW 9 | HW1 0 | HW1 1 | HW1 2 |
| MELBOURNE, AUSTRALIA   | 1988-2009 | 140400          | 23            | 15   | 9    | 16   | 9    | 6   | 10  | 5    | 2    | 6     | 2     | 1     |
| SYDNEY, AUSTRALIA      | 1988-2009 | 161899          | 25            | 20   | 15   | 16   | 11   | 7   | 10  | 6    | 3    | 4     | 2     | 1     |
| BRISBANE, AUSTRALIA    | 1988-2009 | 59685           | 29            | 23   | 19   | 21   | 16   | 13  | 14  | 10   | 8    | 5     | 3     | 2     |
| PORTO ALEGRE, BRAZIL   | 1997-2011 | 66822           | 27            | 21   | 17   | 19   | 14   | 11  | 13  | 9    | 7    | 6     | 3     | 2     |
| CURITIBA, BRAZIL       | 1997-2011 | 47278           | 24            | 17   | 14   | 17   | 11   | 9   | 9   | 6    | 4    | 4     | 3     | 2     |
| SAP PAULO, BRAZIL      | 1997-2011 | 288006          | 23            | 17   | 15   | 16   | 11   | 8   | 10  | 8    | 6    | 5     | 3     | 2     |
| VITORIA, BRAZIL        | 1997-2011 | 17165           | 27            | 23   | 20   | 20   | 16   | 15  | 14  | 11   | 10   | 6     | 4     | 3     |
| BELO HORIZONTE, BRAZIL | 1997-2011 | 155502          | 19            | 16   | 14   | 14   | 12   | 8   | 8   | 7    | 4    | 4     | 3     | 2     |
| GOIANIA, BRAZIL        | 1997-2011 | 44611           | 23            | 20   | 17   | 18   | 15   | 13  | 13  | 10   | 8    | 6     | 4     | 3     |
| BRASILIA, BRAZIL       | 1997-2011 | 37087           | 24            | 21   | 19   | 19   | 16   | 13  | 13  | 11   | 8    | 6     | 4     | 3     |
| CUIABA, BRAZIL         | 1997-2011 | 16659           | 19            | 13   | 8    | 14   | 9    | 6   | 9   | 6    | 4    | 4     | 2     | 1     |
| SALVADOR, BRAZIL       | 1997-2011 | 73998           | 28            | 22   | 17   | 21   | 17   | 14  | 13  | 11   | 9    | 7     | 5     | 4     |
| MACEIO, BRAZIL         | 1997-2011 | 30648           | 18            | 13   | 11   | 13   | 9    | 7   | 9   | 6    | 5    | 4     | 2     | 1     |
| RECIFE, BRAZIL         | 1997-2011 | 85922           | 26            | 19   | 16   | 18   | 14   | 12  | 12  | 10   | 9    | 6     | 5     | 4     |
| JOAO PESSOA, BRAZIL    | 1997-     | 23282           | 24            | 20   | 17   | 17   | 15   | 12  | 12  | 10   | 8    | 6     | 5     | 4     |

|                            |           |       |    |    |    |    |    |    |    |    |    |   |   |   |
|----------------------------|-----------|-------|----|----|----|----|----|----|----|----|----|---|---|---|
|                            | 2011      |       |    |    |    |    |    |    |    |    |    |   |   |   |
| NATAL, BRAZIL              | 1997-2011 | 26323 | 27 | 21 | 17 | 19 | 14 | 11 | 13 | 9  | 7  | 6 | 3 | 2 |
| TERESINA, BRAZIL           | 1997-2011 | 21556 | 28 | 24 | 22 | 21 | 18 | 15 | 13 | 10 | 8  | 5 | 3 | 2 |
| FORTALEZA, BRAZIL          | 1997-2011 | 65341 | 17 | 12 | 9  | 11 | 7  | 5  | 6  | 4  | 2  | 1 | 1 | 0 |
| MANAUS, BRAZIL             | 1997-2011 | 31989 | 26 | 24 | 20 | 21 | 19 | 15 | 14 | 11 | 8  | 7 | 5 | 3 |
| SAO LUIS, BRAZIL           | 1997-2011 | 26123 | 19 | 16 | 12 | 13 | 10 | 7  | 7  | 5  | 4  | 2 | 1 | 1 |
| BELEM, BRAZIL              | 1997-2011 | 42837 | 17 | 13 | 9  | 12 | 8  | 6  | 8  | 6  | 5  | 4 | 4 | 3 |
| ABBOTSFORD, CANADA         | 1986-2011 | 8572  | 32 | 26 | 22 | 23 | 18 | 14 | 15 | 12 | 9  | 7 | 5 | 3 |
| CALGARY, CANADA            | 1986-2011 | 42293 | 30 | 24 | 20 | 22 | 17 | 14 | 14 | 11 | 8  | 6 | 4 | 2 |
| EDMONTON, CANADA           | 1986-2011 | 49262 | 31 | 26 | 23 | 22 | 18 | 15 | 14 | 11 | 9  | 7 | 4 | 3 |
| HALIFAX, CANADA            | 1986-2011 | 22407 | 32 | 27 | 24 | 23 | 18 | 15 | 15 | 11 | 9  | 7 | 5 | 3 |
| HAMILTON, CANADA           | 1986-2011 | 35884 | 31 | 26 | 22 | 23 | 19 | 14 | 15 | 12 | 10 | 7 | 4 | 3 |
| KINGSTON, CANADA           | 1986-2011 | 12362 | 30 | 26 | 23 | 24 | 19 | 15 | 14 | 11 | 8  | 6 | 4 | 3 |
| KITCHENER-WATERLOO, CANADA | 1986-2011 | 22176 | 28 | 24 | 20 | 21 | 17 | 13 | 13 | 10 | 9  | 6 | 4 | 3 |
| LONDON ONTARIO, CANADA     | 1986-2011 | 30429 | 30 | 26 | 22 | 22 | 18 | 15 | 15 | 12 | 10 | 6 | 5 | 4 |
| MONTREAL, CANADA           | 1986-2009 | 79813 | 31 | 27 | 23 | 22 | 19 | 16 | 15 | 12 | 9  | 7 | 4 | 3 |
| NIAGARA, CANADA            | 1986-2011 | 30931 | 32 | 27 | 23 | 23 | 19 | 15 | 14 | 12 | 10 | 7 | 4 | 3 |
| OAKVILLE, CANADA           | 1986-2011 | 18543 | 30 | 25 | 21 | 22 | 17 | 14 | 14 | 11 | 8  | 7 | 5 | 3 |
| OSHAWA, CANADA             | 1986-2011 | 22707 | 31 | 26 | 22 | 22 | 18 | 14 | 14 | 11 | 8  | 6 | 4 | 3 |
| OTTAWA, CANADA             | 1986-2011 | 43017 | 31 | 27 | 22 | 22 | 19 | 15 | 15 | 12 | 9  | 7 | 4 | 2 |
| REGINA, CANADA             | 1986-2011 | 15797 | 29 | 23 | 19 | 21 | 16 | 12 | 13 | 8  | 6  | 6 | 4 | 2 |
| SARNIA, CANADA             | 1986-     | 8874  | 29 | 25 | 21 | 21 | 18 | 14 | 15 | 12 | 9  | 7 | 4 | 2 |

|                          |           |        |    |    |    |    |    |    |    |    |    |    |    |    |
|--------------------------|-----------|--------|----|----|----|----|----|----|----|----|----|----|----|----|
|                          | 2011      |        |    |    |    |    |    |    |    |    |    |    |    |    |
| SUDBURY, CANADA          | 1986-2011 | 13079  | 31 | 27 | 23 | 23 | 19 | 16 | 15 | 12 | 9  | 7  | 5  | 4  |
| SAINT JOHN NB, CANADA    | 1986-2011 | 13676  | 31 | 24 | 20 | 21 | 16 | 12 | 13 | 9  | 7  | 6  | 4  | 2  |
| ST. JOHN'S NFL, CANADA   | 1986-2011 | 17001  | 30 | 24 | 20 | 22 | 17 | 14 | 14 | 10 | 7  | 6  | 4  | 3  |
| SAULT STE. MARIE, CANADA | 1986-2011 | 9327   | 31 | 25 | 22 | 22 | 18 | 16 | 15 | 11 | 9  | 7  | 5  | 2  |
| SASKATOON, CANADA        | 1986-2011 | 18102  | 29 | 24 | 19 | 21 | 16 | 12 | 13 | 9  | 7  | 6  | 4  | 2  |
| THUNDER BAY, CANADA      | 1986-2011 | 11437  | 29 | 24 | 19 | 22 | 16 | 12 | 13 | 9  | 6  | 6  | 3  | 2  |
| TORONTO, CANADA          | 1986-2011 | 215163 | 32 | 28 | 23 | 23 | 18 | 15 | 14 | 12 | 9  | 7  | 6  | 4  |
| VICTORIA, CANADA         | 1986-2011 | 26457  | 30 | 25 | 21 | 22 | 17 | 12 | 14 | 10 | 7  | 7  | 5  | 3  |
| VANCOUVER, CANADA        | 1986-2011 | 103396 | 33 | 29 | 25 | 24 | 19 | 15 | 15 | 12 | 9  | 7  | 5  | 3  |
| WINDSOR, CANADA          | 1986-2011 | 20264  | 30 | 26 | 21 | 22 | 19 | 15 | 15 | 11 | 8  | 7  | 5  | 3  |
| WINNIPEG, CANADA         | 1986-2011 | 53136  | 30 | 24 | 19 | 21 | 16 | 12 | 14 | 10 | 6  | 6  | 4  | 2  |
| HONG KONG, CHINA         | 2002-2009 | 89337  | 54 | 49 | 44 | 54 | 49 | 44 | 21 | 15 | 12 | 21 | 15 | 12 |
| GUANGZHOU, CHINA         | 2005-2007 | 10033  | 32 | 29 | 24 | 25 | 23 | 19 | 17 | 15 | 12 | 7  | 4  | 3  |
| WUHAN, CHINA             | 2004-2008 | 5998   | 33 | 30 | 26 | 25 | 22 | 18 | 17 | 15 | 10 | 8  | 6  | 5  |
| SHANGHAI, CHINA          | 2005-2007 | 22743  | 34 | 30 | 27 | 26 | 22 | 18 | 16 | 14 | 10 | 8  | 5  | 2  |
| TIANJIN, CHINA           | 2005-2007 | 19409  | 35 | 26 | 22 | 24 | 19 | 16 | 14 | 10 | 8  | 7  | 5  | 4  |
| BEIJING, CHINA           | 2005-2007 | 25183  | 33 | 29 | 21 | 25 | 19 | 11 | 14 | 8  | 6  | 6  | 5  | 4  |
| BOGOTA, COLOMBIA         | 1998-2013 | 124605 | 14 | 9  | 6  | 9  | 6  | 4  | 6  | 4  | 2  | 2  | 1  | 1  |
| BARRANQUILLA, COLOMBIA   | 1998-2013 | 28656  | 14 | 9  | 5  | 7  | 5  | 2  | 5  | 3  | 1  | 2  | 1  | 0  |
| CALI, COLOMBIA           | 1998-2013 | 47457  | 11 | 8  | 6  | 8  | 5  | 3  | 5  | 3  | 2  | 3  | 1  | 1  |
| CARTAGENA, COLOMBIA      | 1998-     | 16166  | 19 | 12 | 8  | 15 | 9  | 5  | 10 | 6  | 2  | 5  | 2  | 1  |

|                                |           |        |    |    |    |    |    |    |    |    |    |   |   |   |
|--------------------------------|-----------|--------|----|----|----|----|----|----|----|----|----|---|---|---|
|                                | 2013      |        |    |    |    |    |    |    |    |    |    |   |   |   |
| MEDELLIN, COLOMBIA             | 1998-2013 | 50852  | 16 | 12 | 8  | 12 | 8  | 5  | 6  | 3  | 2  | 3 | 1 | 1 |
| MASHHAD, IRAN                  | 2004-2013 | 40824  | 34 | 31 | 27 | 25 | 22 | 16 | 18 | 15 | 12 | 8 | 6 | 4 |
| WEST, NORTHERN IRELAND         | 1984-2007 | 39306  | 31 | 26 | 22 | 23 | 18 | 15 | 15 | 12 | 8  | 8 | 6 | 4 |
| EAST, NORTHERN IRELAND         | 1984-2007 | 65690  | 31 | 25 | 21 | 23 | 19 | 15 | 15 | 12 | 9  | 7 | 5 | 4 |
| NORTHEAST, REPUBLIC OF IRELAND | 1984-2007 | 33862  | 30 | 25 | 22 | 22 | 18 | 16 | 14 | 11 | 9  | 7 | 5 | 4 |
| SOUTHWEST, REPUBLIC OF IRELAND | 1984-2007 | 81484  | 31 | 28 | 24 | 23 | 19 | 17 | 15 | 12 | 10 | 7 | 6 | 5 |
| NORTHWEST, REPUBLIC OF IRELAND | 1984-2007 | 22464  | 31 | 27 | 23 | 22 | 18 | 16 | 15 | 11 | 8  | 6 | 5 | 3 |
| SOUTHEAST, REPUBLIC OF IRELAND | 1984-2007 | 73846  | 30 | 24 | 21 | 23 | 17 | 14 | 14 | 10 | 7  | 6 | 4 | 3 |
| PALERMO, ITALY                 | 1997-2001 | 8009   | 30 | 25 | 23 | 21 | 17 | 16 | 13 | 11 | 8  | 6 | 4 | 2 |
| BARI, ITALY                    | 1996-2007 | 9487   | 31 | 27 | 24 | 22 | 18 | 15 | 14 | 11 | 8  | 6 | 4 | 3 |
| LATINA, ITALY                  | 1995-2006 | 2532   | 34 | 33 | 31 | 25 | 24 | 23 | 17 | 16 | 14 | 8 | 7 | 6 |
| FROSINONE, ITALY               | 1995-2006 | 996    | 33 | 30 | 29 | 24 | 22 | 20 | 16 | 13 | 12 | 8 | 6 | 5 |
| ROMA, ITALY                    | 1987-2010 | 159066 | 35 | 33 | 30 | 26 | 24 | 23 | 17 | 15 | 14 | 8 | 6 | 5 |
| VITERBO, ITALY                 | 1995-2006 | 1898   | 35 | 34 | 31 | 25 | 23 | 21 | 16 | 15 | 13 | 8 | 6 | 5 |
| GENOVA, ITALY                  | 1999-2007 | 21779  | 33 | 30 | 27 | 24 | 22 | 19 | 14 | 13 | 11 | 7 | 6 | 5 |
| BOLOGNA, ITALY                 | 1996-2010 | 17787  | 32 | 29 | 27 | 24 | 20 | 19 | 15 | 13 | 10 | 7 | 5 | 4 |
| TORINO, ITALY                  | 1991-1999 | 20441  | 34 | 32 | 28 | 24 | 22 | 17 | 15 | 13 | 10 | 7 | 6 | 4 |
| BRESCIA, ITALY                 | 1993-2003 | 6813   | 34 | 30 | 28 | 25 | 22 | 18 | 15 | 13 | 11 | 7 | 6 | 5 |
| AICHI, JAPAN                   | 1972-2012 | 467918 | 35 | 33 | 30 | 26 | 24 | 21 | 18 | 15 | 13 | 8 | 6 | 5 |
| AKITA, JAPAN                   | 1972-2012 | 126294 | 34 | 31 | 30 | 26 | 24 | 21 | 17 | 15 | 14 | 8 | 7 | 6 |
| AOMORI, JAPAN                  | 1972-     | 141127 | 35 | 32 | 29 | 25 | 23 | 21 | 17 | 14 | 13 | 8 | 6 | 5 |

|                  | 2012      |        |    |    |    |    |    |    |    |    |    |   |   |   |
|------------------|-----------|--------|----|----|----|----|----|----|----|----|----|---|---|---|
| CHIBA, JAPAN     | 1972-2012 | 369536 | 35 | 33 | 30 | 25 | 22 | 19 | 17 | 15 | 13 | 8 | 6 | 5 |
| EHIME, JAPAN     | 1972-2012 | 148563 | 35 | 33 | 30 | 25 | 23 | 21 | 16 | 14 | 12 | 8 | 6 | 5 |
| FUKUSHIMA, JAPAN | 1972-2012 | 195153 | 35 | 31 | 29 | 25 | 23 | 20 | 17 | 14 | 12 | 8 | 6 | 5 |
| FUKUI, JAPAN     | 1972-2012 | 74642  | 34 | 32 | 29 | 26 | 23 | 21 | 16 | 14 | 12 | 8 | 7 | 5 |
| FUKUOKA, JAPAN   | 1972-2012 | 402377 | 34 | 31 | 29 | 26 | 23 | 21 | 17 | 15 | 12 | 7 | 6 | 5 |
| GIFU, JAPAN      | 1972-2012 | 171340 | 35 | 33 | 29 | 26 | 23 | 20 | 17 | 14 | 12 | 9 | 7 | 5 |
| GUNMA, JAPAN     | 1972-2012 | 168499 | 34 | 31 | 28 | 25 | 22 | 19 | 17 | 13 | 11 | 8 | 6 | 5 |
| HOKKAIDO, JAPAN  | 1972-2012 | 479712 | 35 | 32 | 30 | 26 | 24 | 22 | 17 | 15 | 13 | 8 | 6 | 6 |
| HIROSHIMA, JAPAN | 1972-2012 | 244198 | 35 | 33 | 30 | 26 | 24 | 22 | 17 | 16 | 14 | 9 | 8 | 7 |
| HYOGO, JAPAN     | 1972-2012 | 442187 | 36 | 34 | 32 | 26 | 23 | 22 | 18 | 15 | 13 | 9 | 7 | 7 |
| IBARAKI, JAPAN   | 1972-2012 | 232953 | 34 | 30 | 27 | 25 | 22 | 19 | 16 | 14 | 11 | 7 | 5 | 4 |
| ISHIKAWA, JAPAN  | 1972-2012 | 102457 | 34 | 32 | 29 | 26 | 23 | 21 | 17 | 14 | 12 | 8 | 6 | 5 |
| IWATE, JAPAN     | 1972-2012 | 133664 | 34 | 32 | 30 | 26 | 23 | 21 | 17 | 15 | 14 | 8 | 7 | 6 |
| KAGAWA, JAPAN    | 1972-2012 | 97113  | 35 | 32 | 30 | 26 | 23 | 22 | 16 | 15 | 13 | 8 | 7 | 6 |
| KANAGAWA, JAPAN  | 1972-2012 | 504261 | 34 | 31 | 28 | 26 | 23 | 20 | 16 | 14 | 12 | 8 | 6 | 4 |
| KAGOSHIMA, JAPAN | 1972-2012 | 189598 | 34 | 31 | 28 | 25 | 22 | 19 | 17 | 14 | 12 | 8 | 6 | 5 |
| KOCHI, JAPAN     | 1972-2012 | 91372  | 34 | 31 | 29 | 26 | 23 | 21 | 16 | 13 | 12 | 8 | 7 | 6 |
| KUMAMOTO, JAPAN  | 1972-2012 | 173796 | 36 | 33 | 30 | 26 | 23 | 21 | 16 | 14 | 12 | 8 | 6 | 5 |
| KYOTO, JAPAN     | 1972-2012 | 217675 | 36 | 33 | 30 | 25 | 23 | 20 | 17 | 14 | 13 | 8 | 6 | 5 |
| MIE, JAPAN       | 1972-2012 | 160694 | 36 | 33 | 29 | 26 | 24 | 22 | 16 | 13 | 12 | 8 | 7 | 5 |
| MIYAGI, JAPAN    | 1972-     | 175850 | 34 | 31 | 29 | 25 | 22 | 20 | 16 | 14 | 12 | 7 | 6 | 5 |



|                  | 2012      |        |    |    |    |    |    |    |    |    |    |    |   |   |
|------------------|-----------|--------|----|----|----|----|----|----|----|----|----|----|---|---|
| MIYAZAKI, JAPAN  | 1972-2012 | 106365 | 33 | 29 | 25 | 26 | 22 | 18 | 16 | 13 | 11 | 7  | 6 | 4 |
| NAGANO, JAPAN    | 1972-2012 | 203609 | 35 | 32 | 29 | 26 | 24 | 21 | 17 | 14 | 12 | 8  | 6 | 5 |
| NAGASAKI, JAPAN  | 1972-2012 | 150753 | 34 | 32 | 30 | 26 | 24 | 22 | 17 | 16 | 14 | 9  | 7 | 6 |
| NARA, JAPAN      | 1972-2012 | 108660 | 34 | 31 | 28 | 26 | 23 | 21 | 18 | 15 | 13 | 8  | 6 | 5 |
| NIIGATA, JAPAN   | 1972-2012 | 232181 | 35 | 33 | 30 | 26 | 23 | 21 | 16 | 14 | 13 | 8  | 6 | 5 |
| OITA, JAPAN      | 1972-2012 | 122626 | 34 | 31 | 28 | 24 | 21 | 19 | 16 | 14 | 12 | 7  | 5 | 4 |
| OKAYAMA, JAPAN   | 1972-2012 | 179087 | 35 | 33 | 31 | 26 | 25 | 23 | 17 | 15 | 13 | 8  | 7 | 7 |
| OKINAWA, JAPAN   | 1973-2012 | 80349  | 33 | 30 | 28 | 29 | 26 | 24 | 18 | 16 | 15 | 10 | 8 | 7 |
| OSAKA, JAPAN     | 1972-2012 | 648975 | 35 | 33 | 30 | 25 | 23 | 21 | 17 | 15 | 13 | 8  | 6 | 5 |
| SAGA, JAPAN      | 1972-2012 | 85154  | 34 | 32 | 30 | 27 | 25 | 23 | 17 | 15 | 13 | 8  | 6 | 5 |
| SAITAMA, JAPAN   | 1972-2012 | 402072 | 35 | 31 | 29 | 26 | 22 | 20 | 16 | 14 | 12 | 8  | 6 | 5 |
| SHIGA, JAPAN     | 1972-2012 | 97398  | 36 | 34 | 32 | 26 | 23 | 21 | 16 | 14 | 13 | 8  | 7 | 6 |
| SHIMANE, JAPAN   | 1972-2012 | 84635  | 36 | 33 | 31 | 26 | 24 | 22 | 17 | 15 | 14 | 8  | 6 | 4 |
| SHIZUOKA, JAPAN  | 1972-2012 | 289420 | 33 | 29 | 26 | 24 | 21 | 18 | 16 | 13 | 10 | 7  | 5 | 3 |
| TOKUSHIMA, JAPAN | 1972-2012 | 85970  | 35 | 32 | 30 | 25 | 22 | 20 | 17 | 15 | 13 | 8  | 7 | 6 |
| TOCHIGI, JAPAN   | 1972-2012 | 162919 | 34 | 31 | 28 | 26 | 23 | 20 | 17 | 14 | 12 | 8  | 6 | 5 |
| TOKYO, JAPAN     | 1972-2012 | 878865 | 34 | 31 | 28 | 26 | 22 | 19 | 16 | 14 | 11 | 8  | 6 | 5 |
| TOTTORI, JAPAN   | 1972-2012 | 62032  | 34 | 32 | 30 | 26 | 23 | 20 | 16 | 14 | 11 | 8  | 6 | 5 |
| TOYAMA, JAPAN    | 1972-2012 | 106444 | 34 | 31 | 29 | 25 | 22 | 19 | 16 | 13 | 11 | 7  | 6 | 4 |
| WAKAYAMA, JAPAN  | 1972-2012 | 111229 | 35 | 32 | 30 | 26 | 23 | 20 | 18 | 16 | 14 | 7  | 5 | 3 |
| YAMAGATA, JAPAN  | 1972-     | 127750 | 35 | 32 | 30 | 26 | 23 | 21 | 17 | 15 | 13 | 8  | 7 | 6 |

|                          |           |        |    |    |    |    |    |    |    |    |    |   |   |   |
|--------------------------|-----------|--------|----|----|----|----|----|----|----|----|----|---|---|---|
|                          | 2012      |        |    |    |    |    |    |    |    |    |    |   |   |   |
| YAMAGUCHI, JAPAN         | 1972-2012 | 159778 | 36 | 33 | 31 | 26 | 24 | 22 | 17 | 15 | 13 | 8 | 7 | 6 |
| YAMANASHI, JAPAN         | 1972-2012 | 78156  | 35 | 33 | 30 | 25 | 23 | 20 | 16 | 14 | 12 | 7 | 6 | 5 |
| GWANGJU, KOREA           | 1992-2010 | 29141  | 34 | 32 | 30 | 26 | 24 | 23 | 17 | 14 | 13 | 7 | 6 | 5 |
| BUSAN, KOREA             | 1992-2010 | 93483  | 35 | 33 | 31 | 26 | 24 | 23 | 17 | 16 | 14 | 8 | 7 | 6 |
| ULSAN, KOREA             | 1992-2010 | 14906  | 25 | 23 | 21 | 19 | 17 | 16 | 12 | 10 | 9  | 6 | 4 | 3 |
| DAEGU, KOREA             | 1992-2010 | 56425  | 34 | 30 | 28 | 25 | 23 | 20 | 17 | 15 | 13 | 8 | 6 | 6 |
| DAEJEON, KOREA           | 1992-2010 | 27575  | 33 | 31 | 30 | 26 | 24 | 22 | 17 | 15 | 14 | 8 | 6 | 5 |
| INCHEON, KOREA           | 1992-2010 | 52896  | 34 | 29 | 28 | 25 | 23 | 21 | 17 | 15 | 13 | 8 | 6 | 6 |
| SEOUL, KOREA             | 1992-2010 | 197995 | 33 | 29 | 26 | 25 | 21 | 20 | 16 | 14 | 13 | 8 | 7 | 6 |
| CAHUL, MOLDOVA           | 2003-2010 | 834    | 34 | 30 | 26 | 25 | 22 | 20 | 16 | 14 | 11 | 8 | 8 | 5 |
| CHISINAU, MOLDOVA        | 2001-2010 | 17309  | 33 | 29 | 25 | 24 | 20 | 16 | 16 | 14 | 12 | 8 | 7 | 6 |
| ANENII NOI, MOLDOVA      | 2003-2010 | 240    | 33 | 29 | 26 | 24 | 20 | 16 | 14 | 12 | 10 | 8 | 7 | 6 |
| FALESTI, MOLDOVA         | 2003-2010 | 445    | 34 | 29 | 25 | 24 | 18 | 16 | 16 | 12 | 11 | 8 | 7 | 6 |
| CEBU, PHILIPPINES        | 2006-2010 | 14984  | 25 | 22 | 18 | 21 | 18 | 14 | 11 | 9  | 8  | 7 | 6 | 6 |
| DAVAO, PHILIPPINES       | 2006-2010 | 14907  | 16 | 12 | 9  | 15 | 11 | 7  | 7  | 5  | 4  | 4 | 2 | 2 |
| MANILA, PHILIPPINES      | 2006-2010 | 30590  | 28 | 24 | 23 | 23 | 20 | 18 | 15 | 12 | 10 | 7 | 5 | 4 |
| QUEZON, PHILIPPINES      | 2006-2010 | 30436  | 26 | 22 | 21 | 21 | 17 | 14 | 15 | 12 | 11 | 7 | 6 | 4 |
| PALMAS G. CANARIA, SPAIN | 1990-2010 | 27039  | 29 | 24 | 20 | 23 | 18 | 14 | 13 | 9  | 6  | 6 | 4 | 3 |
| TENERIFE, SPAIN          | 1990-2010 | 16326  | 29 | 26 | 21 | 22 | 18 | 14 | 14 | 10 | 8  | 7 | 5 | 4 |
| MELILLA, SPAIN           | 1990-2010 | 2738   | 34 | 30 | 27 | 24 | 20 | 17 | 14 | 11 | 8  | 6 | 3 | 2 |
| CEUTA, SPAIN             | 1990-     | 3069   | 11 | 9  | 7  | 8  | 6  | 4  | 5  | 3  | 3  | 2 | 1 | 0 |

|                       | 2010      |        |    |    |    |    |    |    |    |    |    |   |   |   |
|-----------------------|-----------|--------|----|----|----|----|----|----|----|----|----|---|---|---|
| CÁDIZ, SPAIN          | 1990-2010 | 12588  | 31 | 26 | 22 | 23 | 19 | 16 | 15 | 12 | 9  | 8 | 5 | 4 |
| MÁLAGA, SPAIN         | 1990-2010 | 35549  | 32 | 26 | 20 | 21 | 16 | 12 | 13 | 9  | 5  | 6 | 3 | 2 |
| ALMERÍA, SPAIN        | 1990-2010 | 12709  | 32 | 26 | 21 | 23 | 18 | 13 | 14 | 10 | 7  | 7 | 4 | 3 |
| GRANADA, SPAIN        | 1990-2010 | 23194  | 35 | 32 | 29 | 26 | 22 | 18 | 17 | 14 | 10 | 8 | 7 | 4 |
| HUELVA, SPAIN         | 1990-2010 | 13142  | 33 | 28 | 25 | 24 | 19 | 16 | 16 | 12 | 10 | 7 | 5 | 4 |
| SEVILLA, SPAIN        | 1990-2010 | 52635  | 35 | 31 | 27 | 25 | 22 | 19 | 17 | 14 | 11 | 8 | 5 | 5 |
| JAÉN, SPAIN           | 1990-2010 | 11011  | 35 | 32 | 27 | 27 | 24 | 19 | 17 | 14 | 11 | 7 | 6 | 5 |
| CÓRDOBA, SPAIN        | 1990-2010 | 21505  | 35 | 32 | 29 | 26 | 23 | 21 | 17 | 14 | 12 | 8 | 5 | 4 |
| MURCIA, SPAIN         | 1990-2010 | 23245  | 34 | 30 | 27 | 24 | 20 | 17 | 14 | 11 | 8  | 6 | 3 | 2 |
| ALICANTE, SPAIN       | 1990-2010 | 15634  | 33 | 29 | 26 | 23 | 19 | 17 | 15 | 12 | 9  | 7 | 5 | 2 |
| BADAJOS, SPAIN        | 1990-2010 | 11335  | 34 | 32 | 25 | 25 | 22 | 16 | 16 | 13 | 11 | 8 | 5 | 4 |
| ALBACETE, SPAIN       | 1990-2010 | 10495  | 35 | 30 | 27 | 25 | 21 | 18 | 17 | 13 | 11 | 7 | 6 | 3 |
| CIUDAD REAL, SPAIN    | 1990-2010 | 6933   | 35 | 33 | 29 | 26 | 23 | 20 | 17 | 14 | 11 | 7 | 5 | 3 |
| CÁCERES, SPAIN        | 1990-2010 | 11104  | 34 | 32 | 28 | 27 | 23 | 18 | 17 | 13 | 10 | 8 | 6 | 4 |
| VALENCIA, SPAIN       | 1990-2010 | 63467  | 33 | 30 | 28 | 25 | 21 | 18 | 14 | 11 | 9  | 6 | 4 | 3 |
| PALMA MALLORCA, SPAIN | 1990-2010 | 25347  | 34 | 29 | 25 | 22 | 18 | 15 | 15 | 12 | 8  | 6 | 4 | 2 |
| TOLEDO, SPAIN         | 1990-2010 | 9639   | 35 | 32 | 29 | 27 | 24 | 21 | 18 | 15 | 11 | 7 | 5 | 3 |
| CASTELLÓN, SPAIN      | 1990-2010 | 12557  | 34 | 31 | 28 | 24 | 21 | 19 | 15 | 12 | 10 | 6 | 5 | 4 |
| CUENCA, SPAIN         | 1990-2010 | 5159   | 36 | 32 | 29 | 25 | 23 | 20 | 16 | 14 | 9  | 8 | 5 | 3 |
| TERUEL, SPAIN         | 1990-2010 | 3844   | 35 | 31 | 27 | 26 | 22 | 18 | 16 | 12 | 8  | 7 | 5 | 2 |
| MADRID, SPAIN         | 1990-     | 171996 | 36 | 33 | 29 | 26 | 22 | 20 | 17 | 14 | 10 | 8 | 5 | 4 |

|                    | 2010      |        |    |    |    |    |    |    |    |    |    |   |   |   |
|--------------------|-----------|--------|----|----|----|----|----|----|----|----|----|---|---|---|
| GUADALAJARA, SPAIN | 1990-2010 | 6275   | 29 | 27 | 23 | 21 | 18 | 16 | 14 | 12 | 9  | 6 | 4 | 3 |
| AVILA, SPAIN       | 1990-2010 | 6736   | 34 | 31 | 27 | 26 | 21 | 18 | 16 | 12 | 10 | 8 | 5 | 3 |
| SALAMANCA, SPAIN   | 1990-2010 | 13985  | 34 | 31 | 27 | 25 | 21 | 17 | 16 | 12 | 10 | 8 | 5 | 4 |
| SEGOVIA, SPAIN     | 1990-2010 | 5424   | 34 | 30 | 25 | 25 | 21 | 16 | 16 | 12 | 9  | 7 | 4 | 3 |
| TARRAGONA, SPAIN   | 1990-2010 | 8439   | 36 | 32 | 30 | 25 | 22 | 20 | 15 | 12 | 9  | 7 | 4 | 3 |
| BARCELONA, SPAIN   | 1990-2010 | 110440 | 34 | 32 | 30 | 26 | 23 | 22 | 17 | 16 | 14 | 8 | 6 | 5 |
| ZAMORA, SPAIN      | 1990-2010 | 6435   | 33 | 30 | 25 | 25 | 22 | 17 | 16 | 13 | 10 | 7 | 5 | 3 |
| LLEIDA, SPAIN      | 1990-2010 | 11309  | 35 | 32 | 29 | 25 | 21 | 17 | 16 | 13 | 10 | 7 | 5 | 3 |
| VALLADOLID, SPAIN  | 1990-2010 | 20582  | 34 | 31 | 26 | 25 | 21 | 17 | 16 | 12 | 11 | 7 | 5 | 3 |
| ZARAGOZA, SPAIN    | 1990-2010 | 43127  | 33 | 30 | 26 | 25 | 21 | 18 | 15 | 12 | 9  | 7 | 5 | 3 |
| SORIA, SPAIN       | 1990-2010 | 4055   | 34 | 32 | 28 | 25 | 22 | 20 | 16 | 13 | 11 | 7 | 4 | 3 |
| GIRONA, SPAIN      | 1990-2010 | 9619   | 34 | 30 | 28 | 24 | 21 | 19 | 16 | 14 | 11 | 7 | 6 | 4 |
| HUESCA, SPAIN      | 1990-2010 | 4824   | 32 | 27 | 24 | 24 | 19 | 16 | 15 | 12 | 9  | 7 | 5 | 3 |
| BURGOS, SPAIN      | 1990-2010 | 13026  | 33 | 30 | 26 | 25 | 22 | 18 | 16 | 11 | 8  | 7 | 4 | 3 |
| OURENSE, SPAIN     | 1990-2010 | 11763  | 33 | 29 | 25 | 23 | 20 | 16 | 15 | 12 | 9  | 7 | 6 | 5 |
| PONTEVEDRA, SPAIN  | 1990-2010 | 9707   | 31 | 27 | 21 | 22 | 18 | 13 | 15 | 12 | 8  | 7 | 4 | 3 |
| LOGROÑO, SPAIN     | 1990-2010 | 10081  | 33 | 29 | 24 | 24 | 20 | 16 | 16 | 11 | 9  | 7 | 4 | 2 |
| LEÓN, SPAIN        | 1990-2010 | 13663  | 33 | 30 | 24 | 25 | 22 | 17 | 16 | 11 | 8  | 7 | 4 | 3 |
| PAMPLONA, SPAIN    | 1990-2010 | 17661  | 32 | 27 | 21 | 25 | 20 | 15 | 15 | 10 | 7  | 7 | 5 | 3 |
| VITORIA, SPAIN     | 1990-2010 | 11721  | 31 | 25 | 19 | 23 | 18 | 12 | 15 | 10 | 6  | 7 | 4 | 3 |
| LUGO, SPAIN        | 1990-     | 10413  | 30 | 25 | 19 | 22 | 17 | 12 | 13 | 8  | 6  | 6 | 3 | 2 |

|                               | 2010      |        |    |    |    |    |    |    |    |    |    |    |   |   |
|-------------------------------|-----------|--------|----|----|----|----|----|----|----|----|----|----|---|---|
| BILBAO, SPAIN                 | 1990-2010 | 24210  | 27 | 22 | 16 | 21 | 15 | 11 | 11 | 8  | 6  | 5  | 3 | 2 |
| SAN SEBASTIÁN, SPAIN          | 1990-2010 | 20326  | 27 | 21 | 16 | 19 | 14 | 10 | 12 | 8  | 5  | 5  | 3 | 2 |
| OVIEDO, SPAIN                 | 1990-2010 | 21508  | 29 | 23 | 19 | 21 | 16 | 12 | 12 | 8  | 5  | 6  | 4 | 2 |
| A CORUÑA, SPAIN               | 1990-2010 | 18713  | 28 | 22 | 17 | 21 | 17 | 12 | 13 | 10 | 7  | 5  | 4 | 2 |
| SANTANDER, SPAIN              | 1990-2010 | 17796  | 31 | 25 | 22 | 20 | 16 | 12 | 13 | 8  | 5  | 5  | 3 | 2 |
| KAOHSIUNG, TAIWAN             | 1994-2007 | 60822  | 36 | 32 | 30 | 24 | 21 | 19 | 18 | 15 | 13 | 10 | 9 | 7 |
| TAIPEI, TAIWAN                | 1994-2007 | 112364 | 34 | 29 | 27 | 26 | 22 | 18 | 16 | 14 | 12 | 7  | 6 | 4 |
| TAICHUNG, TAIWAN              | 1994-2007 | 45116  | 34 | 29 | 26 | 24 | 20 | 16 | 16 | 12 | 10 | 8  | 6 | 4 |
| NARATHIWAT, THAILAND          | 1999-2008 | 5068   | 26 | 21 | 18 | 23 | 18 | 14 | 14 | 10 | 7  | 5  | 4 | 3 |
| YALA, THAILAND                | 1999-2008 | 3575   | 11 | 9  | 7  | 9  | 6  | 5  | 5  | 3  | 3  | 3  | 2 | 1 |
| PATTANI, THAILAND             | 1999-2008 | 4006   | 25 | 20 | 18 | 20 | 16 | 14 | 13 | 10 | 8  | 6  | 4 | 3 |
| SONGKHLA, THAILAND            | 1999-2008 | 11280  | 22 | 18 | 14 | 16 | 13 | 10 | 10 | 8  | 5  | 4  | 3 | 3 |
| TRANG, THAILAND               | 1999-2008 | 4495   | 27 | 24 | 21 | 20 | 17 | 14 | 14 | 12 | 9  | 6  | 6 | 4 |
| KRABI, THAILAND               | 1999-2008 | 2462   | 20 | 17 | 15 | 14 | 12 | 11 | 10 | 8  | 6  | 4  | 2 | 2 |
| NAKHON SI THAMMARAT, THAILAND | 1999-2008 | 13085  | 11 | 8  | 7  | 8  | 6  | 5  | 4  | 3  | 2  | 2  | 2 | 1 |
| SURAT THANI, THAILAND         | 1999-2008 | 7687   | 25 | 21 | 20 | 21 | 17 | 15 | 12 | 10 | 8  | 6  | 5 | 3 |
| CHUMPHON, THAILAND            | 1999-2008 | 4209   | 31 | 29 | 27 | 24 | 21 | 18 | 16 | 14 | 12 | 8  | 7 | 4 |
| PRACHUAP KHIRI KHAN, THAILAND | 1999-2008 | 4906   | 26 | 21 | 16 | 17 | 14 | 8  | 14 | 11 | 7  | 6  | 4 | 3 |
| CHANTHABURI, THAILAND         | 1999-2008 | 7443   | 25 | 20 | 16 | 18 | 13 | 11 | 11 | 9  | 7  | 7  | 6 | 4 |
| RAYONG, THAILAND              | 1999-2008 | 6189   | 34 | 33 | 32 | 26 | 24 | 22 | 17 | 15 | 14 | 8  | 7 | 6 |
| PHETCHABURI, THAILAND         | 1999-     | 4743   | 31 | 26 | 23 | 23 | 20 | 16 | 16 | 14 | 11 | 7  | 5 | 4 |

|                             | 2008      |       |    |    |    |    |    |    |    |    |    |   |   |   |
|-----------------------------|-----------|-------|----|----|----|----|----|----|----|----|----|---|---|---|
| CHON BURI, THAILAND         | 1999-2008 | 16072 | 20 | 16 | 13 | 16 | 11 | 9  | 9  | 7  | 5  | 5 | 4 | 3 |
| SAMUTPRAKAN, THAILAND       | 1999-2008 | 10063 | 26 | 22 | 18 | 19 | 16 | 12 | 14 | 11 | 8  | 6 | 5 | 2 |
| RATCHABURI, THAILAND        | 1999-2008 | 9918  | 32 | 30 | 28 | 25 | 22 | 20 | 17 | 15 | 14 | 7 | 6 | 6 |
| SAMUT SAKHON, THAILAND      | 1999-2008 | 5155  | 16 | 10 | 8  | 16 | 10 | 8  | 9  | 6  | 3  | 5 | 4 | 2 |
| CHACHOENSAO, THAILAND       | 1999-2008 | 6948  | 26 | 24 | 20 | 19 | 17 | 14 | 14 | 12 | 9  | 6 | 5 | 4 |
| BANGKOK, THAILAND           | 1999-2008 | 81210 | 30 | 27 | 23 | 22 | 18 | 13 | 14 | 12 | 9  | 7 | 5 | 4 |
| SA KAE0, THAILAND           | 1999-2008 | 4684  | 27 | 23 | 20 | 19 | 19 | 16 | 14 | 12 | 10 | 7 | 6 | 4 |
| NONTHABURI, THAILAND        | 1999-2008 | 10489 | 31 | 28 | 25 | 24 | 21 | 19 | 16 | 15 | 14 | 8 | 6 | 4 |
| NAKHON PATHOM, THAILAND     | 1999-2008 | 8492  | 33 | 30 | 27 | 25 | 22 | 20 | 17 | 13 | 10 | 8 | 7 | 6 |
| KANCHANABURI, THAILAND      | 1999-2008 | 7249  | 29 | 25 | 23 | 23 | 20 | 19 | 15 | 14 | 13 | 8 | 7 | 5 |
| PATHUM THANI, THAILAND      | 1999-2008 | 7398  | 23 | 21 | 18 | 20 | 17 | 14 | 12 | 10 | 8  | 7 | 5 | 5 |
| PRACHIN BURI, THAILAND      | 1999-2008 | 4935  | 22 | 18 | 17 | 16 | 14 | 12 | 11 | 9  | 7  | 5 | 4 | 4 |
| AYUTTHAYA, THAILAND         | 1999-2008 | 8173  | 30 | 27 | 25 | 24 | 21 | 20 | 15 | 14 | 12 | 8 | 6 | 4 |
| SUPHANBURI, THAILAND        | 1999-2008 | 8073  | 27 | 23 | 22 | 24 | 21 | 19 | 15 | 14 | 12 | 7 | 6 | 5 |
| SARABURI, THAILAND          | 1999-2008 | 7652  | 35 | 31 | 29 | 28 | 25 | 23 | 16 | 14 | 12 | 8 | 6 | 4 |
| LOP BURI, THAILAND          | 1999-2008 | 9947  | 20 | 15 | 11 | 15 | 10 | 8  | 9  | 6  | 4  | 3 | 2 | 1 |
| SURIN, THAILAND             | 1999-2008 | 10238 | 30 | 26 | 23 | 23 | 20 | 15 | 16 | 13 | 10 | 8 | 6 | 5 |
| NAKHON RATCHASIMA, THAILAND | 1999-2008 | 25182 | 29 | 26 | 22 | 23 | 19 | 17 | 16 | 14 | 12 | 7 | 6 | 4 |
| BURI RAM, THAILAND          | 1999-2008 | 10646 | 12 | 11 | 10 | 10 | 10 | 9  | 6  | 5  | 5  | 3 | 3 | 2 |
| SI SA KET, THAILAND         | 1999-2008 | 12043 | 30 | 25 | 22 | 24 | 20 | 17 | 15 | 13 | 10 | 7 | 6 | 4 |
| UBON RATCHATHANI, THAILAND  | 1999-     | 16204 | 30 | 28 | 24 | 24 | 20 | 18 | 15 | 12 | 10 | 8 | 7 | 5 |

|                            | 2008      |       |    |    |    |    |    |    |    |    |    |   |   |   |
|----------------------------|-----------|-------|----|----|----|----|----|----|----|----|----|---|---|---|
| NAKHON SAWAN, THAILAND     | 1999-2008 | 12885 | 33 | 30 | 28 | 26 | 24 | 22 | 17 | 15 | 14 | 8 | 7 | 5 |
| YASOTHON, THAILAND         | 1999-2008 | 5233  | 25 | 21 | 19 | 19 | 16 | 15 | 14 | 11 | 10 | 7 | 6 | 5 |
| CHAIYAPHUM, THAILAND       | 1999-2008 | 9470  | 32 | 27 | 25 | 23 | 19 | 16 | 17 | 15 | 11 | 7 | 6 | 3 |
| AMNAT CHAROEN, THAILAND    | 1999-2008 | 3447  | 20 | 16 | 13 | 16 | 12 | 9  | 11 | 7  | 6  | 5 | 2 | 0 |
| ROI ET, THAILAND           | 1999-2008 | 13239 | 23 | 19 | 16 | 18 | 14 | 13 | 12 | 10 | 7  | 5 | 5 | 3 |
| MAHA SAKHAM, THAILAND      | 1999-2008 | 8452  | 28 | 24 | 20 | 22 | 19 | 15 | 15 | 12 | 9  | 7 | 6 | 5 |
| PHETCHABUN, THAILAND       | 1999-2008 | 8941  | 6  | 4  | 3  | 4  | 3  | 2  | 3  | 2  | 2  | 2 | 1 | 1 |
| KALASIN, THAILAND          | 1999-2008 | 10235 | 26 | 22 | 20 | 17 | 14 | 11 | 12 | 10 | 9  | 6 | 5 | 5 |
| KHON KAEN, THAILAND        | 1999-2008 | 20322 | 30 | 27 | 23 | 23 | 19 | 16 | 15 | 12 | 10 | 7 | 6 | 5 |
| PHICHIT, THAILAND          | 1999-2008 | 5148  | 30 | 28 | 24 | 23 | 20 | 19 | 16 | 14 | 12 | 8 | 7 | 6 |
| MUKDAHAN, THAILAND         | 1999-2008 | 2496  | 31 | 27 | 24 | 25 | 22 | 20 | 15 | 13 | 12 | 8 | 6 | 4 |
| KAMPHAENG PHET, THAILAND   | 1999-2008 | 4551  | 23 | 20 | 15 | 17 | 14 | 11 | 12 | 10 | 8  | 6 | 5 | 4 |
| PHITSANULOK, THAILAND      | 1999-2008 | 10489 | 30 | 26 | 25 | 22 | 19 | 17 | 15 | 13 | 12 | 8 | 7 | 4 |
| TAK, THAILAND              | 1999-2008 | 3925  | 24 | 22 | 18 | 18 | 14 | 12 | 14 | 11 | 9  | 5 | 3 | 3 |
| SUKHOTHAI, THAILAND        | 1999-2008 | 6057  | 30 | 26 | 22 | 23 | 19 | 17 | 15 | 13 | 11 | 8 | 7 | 6 |
| SAKON NAKHON, THAILAND     | 1999-2008 | 10656 | 22 | 20 | 16 | 17 | 14 | 12 | 11 | 9  | 7  | 6 | 4 | 3 |
| NONG BUA LAM PHU, THAILAND | 1999-2008 | 4236  | 31 | 29 | 27 | 24 | 22 | 19 | 18 | 15 | 13 | 8 | 6 | 5 |
| NAKHON PHANOM, THAILAND    | 1999-2008 | 5384  | 26 | 21 | 16 | 18 | 13 | 9  | 14 | 10 | 6  | 6 | 4 | 3 |
| UDON THANI, THAILAND       | 1999-2008 | 15321 | 25 | 23 | 20 | 20 | 17 | 14 | 14 | 12 | 10 | 6 | 5 | 4 |
| UTTARADIT, THAILAND        | 1999-2008 | 6835  | 31 | 28 | 23 | 24 | 20 | 16 | 15 | 12 | 9  | 8 | 6 | 4 |
| NONG KHAI, THAILAND        | 1999-     | 6945  | 30 | 27 | 23 | 22 | 19 | 16 | 17 | 14 | 12 | 8 | 6 | 4 |

|                              | 2008      |        |    |    |    |    |    |    |    |    |    |   |   |   |
|------------------------------|-----------|--------|----|----|----|----|----|----|----|----|----|---|---|---|
| PHRAE, THAILAND              | 1999-2008 | 7548   | 30 | 26 | 22 | 22 | 18 | 16 | 15 | 13 | 11 | 8 | 7 | 5 |
| LAMPANG, THAILAND            | 1999-2008 | 12937  | 33 | 30 | 28 | 24 | 22 | 22 | 17 | 14 | 11 | 8 | 6 | 5 |
| LAMPHUN, THAILAND            | 1999-2008 | 5461   | 27 | 24 | 22 | 22 | 20 | 20 | 15 | 14 | 12 | 8 | 6 | 6 |
| NAN, THAILAND                | 1999-2008 | 6419   | 29 | 28 | 25 | 23 | 20 | 18 | 16 | 14 | 13 | 9 | 8 | 6 |
| CHIANG MAI, THAILAND         | 1999-2008 | 26170  | 20 | 18 | 16 | 15 | 14 | 12 | 11 | 9  | 8  | 6 | 4 | 4 |
| PHAYAO, THAILAND             | 1999-2008 | 8185   | 34 | 31 | 28 | 26 | 24 | 21 | 16 | 15 | 12 | 8 | 6 | 5 |
| CHIANG RAI, THAILAND         | 1999-2008 | 18526  | 24 | 19 | 15 | 19 | 14 | 10 | 13 | 10 | 7  | 6 | 4 | 2 |
| EAST, UK                     | 1990-2012 | 349071 | 31 | 27 | 22 | 23 | 20 | 16 | 15 | 11 | 9  | 7 | 5 | 4 |
| EAST MIDLANDS, UK            | 1990-2012 | 281307 | 30 | 25 | 22 | 22 | 19 | 16 | 14 | 11 | 9  | 7 | 6 | 4 |
| LONDON, UK                   | 1990-2012 | 384191 | 31 | 26 | 23 | 22 | 19 | 16 | 15 | 12 | 10 | 7 | 5 | 4 |
| NORTH EAST, UK               | 1990-2012 | 190551 | 30 | 25 | 21 | 22 | 18 | 16 | 14 | 11 | 9  | 7 | 5 | 3 |
| NORTH WEST, UK               | 1990-2012 | 495075 | 30 | 26 | 23 | 22 | 19 | 17 | 15 | 12 | 9  | 7 | 6 | 4 |
| SOUTH EAST, UK               | 1990-2012 | 526489 | 31 | 27 | 23 | 23 | 20 | 16 | 15 | 12 | 10 | 8 | 6 | 4 |
| SOUTH WEST, UK               | 1990-2012 | 360927 | 31 | 27 | 24 | 23 | 19 | 17 | 15 | 12 | 9  | 7 | 6 | 5 |
| WALES, UK                    | 1990-2012 | 219114 | 31 | 27 | 24 | 23 | 20 | 16 | 15 | 13 | 11 | 7 | 6 | 5 |
| WEST MIDLANDS, UK            | 1990-2012 | 356808 | 29 | 25 | 22 | 22 | 18 | 16 | 15 | 12 | 10 | 7 | 6 | 4 |
| YORKSHIRE & HUMBER, UK       | 1990-2012 | 349510 | 31 | 27 | 23 | 23 | 20 | 17 | 15 | 12 | 9  | 7 | 5 | 4 |
| AKRON, OH, USA               | 1985-2006 | 33295  | 33 | 29 | 25 | 25 | 21 | 19 | 17 | 14 | 11 | 7 | 5 | 3 |
| ALBUQUERQUE, NM, USA         | 1985-2006 | 22151  | 37 | 33 | 29 | 24 | 22 | 19 | 17 | 14 | 11 | 8 | 6 | 5 |
| ALLENTOWN-BETHLEHEM, PA, USA | 1985-2006 | 18616  | 33 | 27 | 23 | 23 | 19 | 16 | 16 | 13 | 10 | 8 | 6 | 5 |
| ATLANTA, GA, USA             | 1985-     | 96303  | 36 | 32 | 29 | 25 | 22 | 19 | 18 | 16 | 14 | 9 | 7 | 5 |



|                              |           |        |    |    |    |    |    |    |    |    |    |    |   |   |
|------------------------------|-----------|--------|----|----|----|----|----|----|----|----|----|----|---|---|
|                              | 2006      |        |    |    |    |    |    |    |    |    |    |    |   |   |
| ATLANTIC CITY, NJ, USA       | 1985-2006 | 15199  | 32 | 27 | 20 | 23 | 17 | 14 | 14 | 10 | 6  | 7  | 4 | 3 |
| AUSTIN, TX, USA              | 1985-2006 | 21831  | 39 | 36 | 34 | 28 | 25 | 23 | 17 | 16 | 14 | 8  | 7 | 5 |
| BAKERSFIELD, CA, USA         | 1985-2006 | 27716  | 33 | 30 | 25 | 26 | 22 | 19 | 17 | 15 | 12 | 8  | 7 | 6 |
| BALTIMORE, MD, USA           | 1985-2006 | 99401  | 33 | 28 | 21 | 23 | 18 | 15 | 17 | 13 | 11 | 8  | 5 | 4 |
| BARNSTABLE-YARMOUTH, MA, USA | 1985-2006 | 16153  | 32 | 27 | 22 | 25 | 21 | 16 | 16 | 13 | 9  | 6  | 4 | 2 |
| BERGEN-PASSAIC, NJ, USA      | 1985-2006 | 73212  | 34 | 29 | 22 | 24 | 18 | 14 | 17 | 13 | 9  | 7  | 4 | 3 |
| BIRMINGHAM, AL, USA          | 1985-2006 | 53165  | 35 | 32 | 28 | 25 | 21 | 20 | 16 | 14 | 12 | 10 | 8 | 6 |
| BOSTON, MA, USA              | 1985-2006 | 145615 | 31 | 25 | 20 | 23 | 17 | 11 | 15 | 10 | 6  | 7  | 5 | 3 |
| BATON ROUGE, LA, USA         | 1985-2006 | 19473  | 36 | 32 | 28 | 28 | 25 | 22 | 16 | 13 | 10 | 8  | 6 | 4 |
| BROWNSVILLE, TX, USA         | 1985-2006 | 10965  | 32 | 28 | 24 | 32 | 28 | 24 | 15 | 12 | 10 | 9  | 7 | 5 |
| BUFFALO, NY, USA             | 1985-2006 | 65843  | 33 | 28 | 24 | 23 | 19 | 16 | 15 | 12 | 10 | 7  | 5 | 4 |
| CANTON-MASSILLON, OH, USA    | 1985-2006 | 23766  | 33 | 29 | 25 | 25 | 21 | 19 | 17 | 14 | 11 | 7  | 5 | 3 |
| CHARLESTON, WV, USA          | 1985-2006 | 15363  | 34 | 30 | 26 | 26 | 22 | 19 | 16 | 13 | 11 | 9  | 7 | 5 |
| CHARLOTTE, NC, USA           | 1985-2006 | 25311  | 34 | 30 | 26 | 25 | 21 | 18 | 18 | 15 | 12 | 9  | 7 | 5 |
| CHATTANOOGA, TN, USA         | 1985-2006 | 18913  | 37 | 34 | 30 | 27 | 24 | 21 | 18 | 15 | 14 | 10 | 8 | 7 |
| CHICAGO, IL, USA             | 1985-2006 | 349050 | 29 | 23 | 19 | 24 | 19 | 15 | 15 | 13 | 9  | 8  | 6 | 4 |
| CINCINNATI, OH, USA          | 1985-2006 | 53094  | 33 | 29 | 26 | 22 | 18 | 15 | 16 | 13 | 11 | 7  | 6 | 5 |
| CLEVELAND, OH, USA           | 1985-2006 | 125455 | 31 | 26 | 21 | 22 | 18 | 15 | 16 | 12 | 10 | 6  | 4 | 3 |
| COLUMBIA, SC, USA            | 1985-2006 | 23635  | 36 | 31 | 28 | 26 | 23 | 20 | 18 | 15 | 12 | 10 | 7 | 5 |
| COLUMBUS, OH, USA            | 1985-2006 | 49586  | 32 | 28 | 24 | 23 | 19 | 16 | 15 | 12 | 10 | 7  | 6 | 4 |
| DALLAS, TX, USA              | 1985-     | 81635  | 37 | 34 | 31 | 27 | 24 | 22 | 19 | 18 | 16 | 8  | 7 | 6 |

|                                     | 2006      |        |    |    |    |    |    |    |    |    |    |   |   |   |
|-------------------------------------|-----------|--------|----|----|----|----|----|----|----|----|----|---|---|---|
| DAYTONA BEACH, FL, USA              | 1985-2006 | 33248  | 36 | 30 | 25 | 26 | 21 | 18 | 19 | 15 | 11 | 9 | 6 | 4 |
| DAYTON, OH, USA                     | 1985-2006 | 33728  | 31 | 27 | 23 | 25 | 21 | 18 | 17 | 14 | 11 | 8 | 6 | 5 |
| DENVER, CO, USA                     | 1985-2006 | 56583  | 33 | 28 | 23 | 23 | 19 | 15 | 15 | 10 | 7  | 7 | 3 | 3 |
| DES MOINES, IA, USA                 | 1985-2006 | 16899  | 33 | 29 | 24 | 25 | 20 | 16 | 16 | 12 | 10 | 7 | 5 | 4 |
| DETROIT, MI, USA                    | 1985-2006 | 229193 | 31 | 27 | 23 | 22 | 19 | 16 | 16 | 14 | 11 | 8 | 5 | 5 |
| DUTCHESS COUNTY, NY, USA            | 1985-2006 | 13143  | 31 | 26 | 21 | 21 | 16 | 13 | 14 | 10 | 8  | 7 | 5 | 4 |
| EL PASO, TX, USA                    | 1985-2006 | 22366  | 31 | 28 | 24 | 24 | 20 | 18 | 17 | 15 | 12 | 8 | 6 | 5 |
| ERIE, PA, USA                       | 1985-2006 | 16916  | 31 | 25 | 20 | 22 | 17 | 14 | 15 | 11 | 8  | 7 | 4 | 2 |
| FLINT, MI, USA                      | 1985-2006 | 23674  | 30 | 25 | 22 | 24 | 20 | 15 | 14 | 11 | 8  | 7 | 4 | 3 |
| FRESNO, CA, USA                     | 1985-2006 | 31852  | 35 | 32 | 28 | 26 | 23 | 20 | 18 | 15 | 12 | 9 | 7 | 6 |
| FT. LAUDERDALE, FL, USA             | 1985-2006 | 97450  | 31 | 24 | 19 | 22 | 16 | 12 | 14 | 10 | 7  | 6 | 3 | 2 |
| FORT MYERS-CAPE CORAL, FL, USA      | 1985-2006 | 27339  | 32 | 25 | 21 | 20 | 15 | 11 | 12 | 8  | 5  | 6 | 4 | 2 |
| FORT PIERCE-PORT ST. LUCIE, FL, USA | 1985-2006 | 20681  | 39 | 32 | 26 | 27 | 22 | 18 | 19 | 14 | 11 | 6 | 3 | 2 |
| FORT WORTH-ARLINGTON, TX, USA       | 1985-2006 | 53579  | 20 | 18 | 16 | 16 | 14 | 13 | 10 | 9  | 9  | 5 | 5 | 3 |
| GALVESTON, TX, USA                  | 1985-2006 | 12921  | 28 | 25 | 20 | 22 | 18 | 14 | 10 | 8  | 7  | 6 | 5 | 3 |
| GARY, IN, USA                       | 1985-2006 | 28345  | 30 | 26 | 21 | 24 | 20 | 16 | 16 | 12 | 9  | 7 | 5 | 4 |
| GRAND RAPIDS, MI, USA               | 1985-2006 | 24572  | 31 | 27 | 23 | 22 | 19 | 16 | 16 | 12 | 10 | 8 | 6 | 4 |
| GREENSBORO, NC, USA                 | 1985-2006 | 20318  | 34 | 29 | 25 | 25 | 22 | 17 | 18 | 14 | 10 | 8 | 6 | 4 |
| GREENVILLE, SC, USA                 | 1985-2006 | 17982  | 37 | 34 | 30 | 27 | 25 | 22 | 16 | 14 | 12 | 8 | 6 | 5 |
| HAMILTON, OH, USA                   | 1985-2006 | 15447  | 33 | 29 | 26 | 22 | 18 | 15 | 16 | 13 | 11 | 7 | 6 | 5 |
| HARRISBURG-CARLISLE, PA, USA        | 1985-     | 15600  | 23 | 21 | 18 | 17 | 14 | 11 | 11 | 10 | 8  | 5 | 4 | 3 |

|                                        | 2006      |        |    |    |    |    |    |    |    |    |    |    |   |   |
|----------------------------------------|-----------|--------|----|----|----|----|----|----|----|----|----|----|---|---|
| HARTFORD, CT, USA                      | 1985-2006 | 48290  | 32 | 26 | 23 | 24 | 19 | 15 | 16 | 13 | 10 | 8  | 6 | 3 |
| HONOLULU, HI, USA                      | 1985-2006 | 24364  | 35 | 31 | 26 | 23 | 19 | 16 | 13 | 10 | 8  | 7  | 5 | 3 |
| HOUSTON, TX, USA                       | 1985-2006 | 115796 | 31 | 26 | 22 | 24 | 20 | 17 | 19 | 15 | 13 | 9  | 8 | 6 |
| INDIANAPOLIS, IN, USA                  | 1985-2006 | 46853  | 35 | 30 | 28 | 25 | 21 | 18 | 15 | 12 | 10 | 7  | 6 | 4 |
| JACKSONVILLE, FL, USA                  | 1985-2006 | 38724  | 36 | 31 | 28 | 28 | 23 | 20 | 16 | 13 | 11 | 9  | 6 | 4 |
| JERSEY CITY, NJ, USA                   | 1985-2006 | 31701  | 34 | 29 | 22 | 24 | 18 | 14 | 17 | 13 | 9  | 7  | 4 | 3 |
| KANSAS CITY, MO-KS, USA                | 1985-2006 | 67807  | 32 | 28 | 24 | 24 | 20 | 16 | 17 | 13 | 11 | 8  | 6 | 4 |
| KNOXVILLE, TN, USA                     | 1985-2006 | 24834  | 36 | 33 | 28 | 26 | 23 | 19 | 17 | 15 | 11 | 8  | 6 | 5 |
| LAKELAND-WINTER HAVEN, FL, USA         | 1985-2006 | 29250  | 39 | 33 | 29 | 27 | 22 | 19 | 18 | 14 | 11 | 7  | 4 | 2 |
| LANCASTER, PA, USA                     | 1985-2006 | 24548  | 32 | 26 | 22 | 26 | 21 | 18 | 16 | 13 | 10 | 9  | 6 | 5 |
| LANSING, MI, USA                       | 1985-2006 | 11583  | 29 | 25 | 21 | 22 | 18 | 15 | 14 | 11 | 8  | 6  | 4 | 2 |
| LAS VEGAS, NV-AZ, USA                  | 1985-2006 | 56467  | 35 | 32 | 28 | 26 | 23 | 20 | 16 | 14 | 12 | 9  | 8 | 6 |
| LOS ANGELES, CA, USA                   | 1985-2006 | 386647 | 31 | 27 | 24 | 23 | 20 | 16 | 14 | 11 | 8  | 7  | 4 | 3 |
| LOUISVILLE, KY, USA                    | 1985-2006 | 42618  | 35 | 31 | 28 | 27 | 24 | 19 | 17 | 14 | 11 | 9  | 7 | 5 |
| LITTLE ROCK, AR, USA                   | 1985-2006 | 19999  | 36 | 32 | 29 | 26 | 23 | 21 | 19 | 17 | 15 | 8  | 6 | 6 |
| LUBBOCK, TX, USA                       | 1985-2006 | 10691  | 33 | 28 | 23 | 24 | 19 | 15 | 14 | 12 | 7  | 7  | 6 | 3 |
| MADISON, WI, USA                       | 1985-2006 | 15106  | 30 | 26 | 21 | 23 | 19 | 14 | 16 | 12 | 8  | 7  | 5 | 4 |
| MCALLEN-EDINBURG-MISSION, TX, USA      | 1985-2006 | 15090  | 33 | 30 | 26 | 24 | 21 | 19 | 17 | 14 | 12 | 7  | 5 | 4 |
| MELBOURNE-TITUSVILLE-PALM BAY, FL, USA | 1985-2006 | 27810  | 34 | 27 | 22 | 24 | 18 | 13 | 15 | 11 | 9  | 7  | 5 | 3 |
| MEMPHIS, TN, USA                       | 1985-2006 | 47476  | 37 | 33 | 30 | 28 | 26 | 22 | 16 | 13 | 11 | 9  | 7 | 6 |
| MIAMI, FL, USA                         | 1985-     | 119487 | 36 | 31 | 26 | 26 | 21 | 17 | 17 | 13 | 9  | 10 | 7 | 5 |

|                               | 2006      |        |    |    |    |    |    |    |    |    |    |   |   |   |
|-------------------------------|-----------|--------|----|----|----|----|----|----|----|----|----|---|---|---|
| MIDDLESEX, NJ, USA            | 1985-2006 | 33829  | 32 | 25 | 20 | 22 | 18 | 14 | 14 | 11 | 9  | 7 | 5 | 4 |
| MILWAUKEE, WI, USA            | 1985-2006 | 71799  | 32 | 26 | 21 | 22 | 16 | 13 | 16 | 11 | 8  | 7 | 5 | 3 |
| MINNEAPOLIS-ST. PAUL, MN, USA | 1985-2006 | 74244  | 32 | 28 | 25 | 24 | 20 | 16 | 16 | 12 | 10 | 7 | 5 | 4 |
| MOBILE, AL, USA               | 1985-2006 | 22679  | 33 | 30 | 26 | 24 | 21 | 17 | 19 | 15 | 13 | 9 | 8 | 5 |
| MONMOUTH-OCEAN, NJ, USA       | 1985-2006 | 73356  | 22 | 18 | 15 | 16 | 12 | 10 | 11 | 8  | 6  | 6 | 4 | 3 |
| MYRTLE BEACH, SC, USA         | 1985-2006 | 9518   | 32 | 28 | 25 | 22 | 18 | 15 | 14 | 11 | 8  | 7 | 5 | 3 |
| NAPLES, FL, USA               | 1985-2006 | 11336  | 35 | 28 | 24 | 23 | 18 | 14 | 23 | 18 | 14 | 7 | 4 | 3 |
| NASHUA, NH, USA               | 1985-2006 | 15701  | 31 | 26 | 21 | 23 | 19 | 15 | 14 | 10 | 7  | 7 | 6 | 4 |
| NASHVILLE, TN, USA            | 1985-2006 | 30097  | 32 | 29 | 24 | 24 | 21 | 18 | 18 | 15 | 13 | 8 | 7 | 5 |
| NASSAU-SUFFOLK, NY, USA       | 1985-2006 | 143694 | 31 | 24 | 20 | 24 | 19 | 14 | 16 | 12 | 10 | 7 | 5 | 4 |
| NEWARK, NJ, USA               | 1985-2006 | 68728  | 34 | 29 | 22 | 24 | 18 | 14 | 17 | 13 | 9  | 7 | 4 | 3 |
| NEWBURGH, NY, USA             | 1985-2006 | 15476  | 31 | 26 | 22 | 22 | 18 | 15 | 14 | 12 | 10 | 7 | 5 | 4 |
| NEW HAVEN-MERIDEN, CT, USA    | 1985-2006 | 48273  | 32 | 26 | 23 | 24 | 19 | 15 | 16 | 13 | 10 | 8 | 6 | 3 |
| NEW LONDON, CT, USA           | 1985-2006 | 12576  | 31 | 24 | 20 | 22 | 16 | 13 | 14 | 11 | 8  | 7 | 5 | 4 |
| NEW YORK, NY, USA             | 1985-2006 | 426430 | 32 | 26 | 22 | 23 | 18 | 14 | 16 | 11 | 8  | 7 | 5 | 3 |
| OAKLAND, CA, USA              | 1985-2006 | 99888  | 20 | 15 | 11 | 14 | 10 | 8  | 10 | 7  | 4  | 4 | 2 | 1 |
| OCALA, FL, USA                | 1985-2006 | 17933  | 32 | 26 | 22 | 23 | 18 | 15 | 17 | 12 | 9  | 7 | 5 | 4 |
| OKLAHOMA CITY, OK, USA        | 1985-2006 | 36601  | 36 | 32 | 29 | 24 | 22 | 19 | 18 | 16 | 14 | 7 | 6 | 5 |
| OMAHA, NE, USA                | 1985-2006 | 22024  | 33 | 29 | 25 | 25 | 20 | 17 | 16 | 13 | 11 | 7 | 5 | 4 |
| ORANGE COUNTY, CA, USA        | 1985-2006 | 98795  | 32 | 28 | 25 | 24 | 21 | 18 | 16 | 13 | 10 | 7 | 5 | 4 |
| ORLANDO, FL, USA              | 1985-     | 49272  | 32 | 27 | 23 | 22 | 18 | 15 | 15 | 12 | 9  | 9 | 6 | 5 |

|                                           | 2006      |        |    |    |    |    |    |    |    |    |    |   |   |   |
|-------------------------------------------|-----------|--------|----|----|----|----|----|----|----|----|----|---|---|---|
| PENSACOLA, FL, USA                        | 1985-2006 | 16165  | 34 | 30 | 24 | 26 | 22 | 19 | 15 | 12 | 9  | 8 | 6 | 4 |
| PHILADELPHIA, PA-NJ, USA                  | 1985-2006 | 279833 | 33 | 28 | 22 | 25 | 20 | 16 | 15 | 12 | 9  | 8 | 6 | 5 |
| PHOENIX, AZ, USA                          | 1985-2006 | 117774 | 36 | 31 | 27 | 27 | 23 | 21 | 19 | 16 | 13 | 9 | 7 | 5 |
| PITTSBURGH, PA, USA                       | 1985-2006 | 97477  | 32 | 29 | 24 | 25 | 21 | 18 | 15 | 11 | 10 | 9 | 6 | 5 |
| PORTLAND, ME, USA                         | 1985-2006 | 14093  | 33 | 27 | 22 | 25 | 19 | 15 | 14 | 10 | 7  | 7 | 4 | 3 |
| PORTLAND, OR, USA                         | 1985-2006 | 65670  | 35 | 29 | 25 | 24 | 19 | 16 | 17 | 13 | 9  | 7 | 5 | 3 |
| PROVIDENCE-FALL RIVER, RI-MA, USA         | 1985-2006 | 11215  | 32 | 25 | 21 | 23 | 18 | 14 | 16 | 11 | 9  | 7 | 4 | 3 |
| PUNTA GORDA, FL, USA                      | 1985-2006 | 11663  | 40 | 33 | 26 | 25 | 19 | 15 | 16 | 11 | 8  | 9 | 6 | 4 |
| RALEIGH, NC, USA                          | 1985-2006 | 18149  | 36 | 32 | 27 | 27 | 24 | 20 | 16 | 13 | 9  | 8 | 5 | 4 |
| READING, PA, USA                          | 1985-2006 | 22163  | 36 | 32 | 27 | 27 | 24 | 20 | 16 | 13 | 9  | 8 | 5 | 4 |
| RIVERSIDE-SAN BERNARDINO, CA, USA         | 1985-2006 | 134247 | 33 | 31 | 27 | 27 | 25 | 22 | 18 | 16 | 14 | 8 | 6 | 5 |
| ROCHESTER, NY, USA                        | 1985-2006 | 39921  | 32 | 28 | 24 | 24 | 19 | 16 | 15 | 12 | 9  | 7 | 5 | 4 |
| ROCKFORD, IL, USA                         | 1985-2006 | 14176  | 31 | 27 | 22 | 23 | 19 | 16 | 16 | 12 | 10 | 8 | 6 | 5 |
| SACRAMENTO, CA, USA                       | 1985-2006 | 53242  | 34 | 29 | 23 | 24 | 19 | 16 | 16 | 12 | 10 | 9 | 6 | 4 |
| SAGINAW, MI, USA                          | 1985-2006 | 12524  | 30 | 25 | 22 | 23 | 19 | 15 | 15 | 12 | 8  | 8 | 5 | 3 |
| SALINAS, CA, USA                          | 1985-2006 | 14338  | 18 | 15 | 10 | 15 | 11 | 6  | 8  | 5  | 3  | 3 | 2 | 1 |
| SALT LAKE CITY, UT, USA                   | 1985-2006 | 27783  | 34 | 30 | 25 | 24 | 19 | 15 | 16 | 13 | 9  | 9 | 6 | 4 |
| SAN ANTONIO, TX, USA                      | 1985-2006 | 57736  | 37 | 34 | 31 | 31 | 28 | 25 | 18 | 15 | 12 | 8 | 6 | 4 |
| SARASOTA-BRADENTON, FL, USA               | 1985-2006 | 46351  | 32 | 28 | 24 | 24 | 20 | 16 | 13 | 10 | 8  | 9 | 7 | 6 |
| SCRANTON--WILKES-BARRE--HAZLETON, PA, USA | 1985-2006 | 46123  | 32 | 27 | 23 | 23 | 19 | 16 | 15 | 13 | 10 | 7 | 5 | 4 |
| SAN DIEGO, CA, USA                        | 1985-     | 116484 | 33 | 29 | 27 | 23 | 21 | 19 | 16 | 14 | 12 | 7 | 5 | 3 |

|                                          |           |       |    |    |    |    |    |    |    |    |    |   |   |   |
|------------------------------------------|-----------|-------|----|----|----|----|----|----|----|----|----|---|---|---|
|                                          | 2006      |       |    |    |    |    |    |    |    |    |    |   |   |   |
| SEATTLE, WA, USA                         | 1985-2006 | 69921 | 35 | 30 | 24 | 24 | 18 | 14 | 16 | 12 | 7  | 8 | 6 | 3 |
| SAN FRANCISCO, CA, USA                   | 1985-2006 | 77042 | 22 | 16 | 12 | 18 | 13 | 9  | 10 | 7  | 4  | 4 | 2 | 1 |
| SHREVEPORT, LA, USA                      | 1985-2006 | 16221 | 34 | 31 | 28 | 29 | 26 | 23 | 19 | 16 | 14 | 9 | 7 | 6 |
| SAN JOSE, CA, USA                        | 1985-2006 | 54245 | 30 | 24 | 18 | 22 | 17 | 12 | 14 | 9  | 6  | 8 | 4 | 2 |
| SPOKANE, WA, USA                         | 1985-2006 | 21294 | 33 | 29 | 25 | 26 | 23 | 19 | 17 | 14 | 11 | 8 | 5 | 4 |
| SPRINGFIELD, MA, USA                     | 1985-2006 | 29030 | 32 | 26 | 23 | 24 | 19 | 15 | 16 | 13 | 10 | 8 | 6 | 3 |
| STAMFORD-NORWALK, CT, USA                | 1985-2006 | 43691 | 33 | 27 | 22 | 25 | 19 | 16 | 16 | 12 | 9  | 8 | 5 | 4 |
| ST. LOUIS, MO-IL, USA                    | 1985-2006 | 96368 | 34 | 30 | 26 | 25 | 22 | 18 | 16 | 13 | 10 | 9 | 6 | 4 |
| STOCKTON-LODI, CA, USA                   | 1985-2006 | 25244 | 32 | 28 | 22 | 26 | 21 | 17 | 16 | 12 | 10 | 8 | 5 | 4 |
| SYRACUSE, NY, USA                        | 1985-2006 | 26252 | 32 | 28 | 23 | 24 | 19 | 16 | 14 | 12 | 9  | 7 | 5 | 3 |
| TACOMA, WA, USA                          | 1985-2006 | 29688 | 33 | 28 | 23 | 24 | 19 | 15 | 15 | 11 | 9  | 8 | 5 | 3 |
| TAMPA-ST. PETERSBURG-CLEARWATER, FL, USA | 1985-2006 | 49811 | 37 | 30 | 24 | 27 | 21 | 17 | 17 | 13 | 10 | 6 | 3 | 3 |
| TOLEDO, OH, USA                          | 1985-2006 | 28669 | 33 | 29 | 25 | 25 | 21 | 17 | 15 | 13 | 10 | 7 | 5 | 4 |
| TRENTON, NJ, USA                         | 1985-2006 | 17869 | 31 | 24 | 19 | 22 | 17 | 13 | 16 | 12 | 9  | 7 | 5 | 4 |
| TUCSON, AZ, USA                          | 1985-2006 | 39643 | 33 | 30 | 26 | 26 | 22 | 19 | 18 | 15 | 12 | 9 | 7 | 5 |
| TULSA, OK, USA                           | 1985-2006 | 29746 | 35 | 31 | 27 | 25 | 21 | 19 | 16 | 13 | 11 | 8 | 6 | 5 |
| UTICA-ROME, NY, USA                      | 1985-2006 | 16479 | 30 | 26 | 21 | 24 | 20 | 17 | 15 | 12 | 10 | 7 | 5 | 3 |
| VENTURA COUNTY, CA, USA                  | 1985-2006 | 27134 | 22 | 20 | 17 | 18 | 16 | 14 | 10 | 8  | 7  | 5 | 3 | 3 |
| VIRGINIA BEACH, VA, USA                  | 1985-2006 | 58165 | 32 | 27 | 22 | 25 | 19 | 15 | 15 | 11 | 8  | 8 | 6 | 3 |
| WASHINGTON, DC-MD-VA, USA                | 1985-2006 | 44237 | 33 | 28 | 23 | 23 | 19 | 15 | 16 | 12 | 10 | 7 | 5 | 3 |
| WICHITA, KS, USA                         | 1985-     | 21215 | 35 | 31 | 26 | 25 | 21 | 18 | 17 | 13 | 12 | 8 | 6 | 5 |

|                                     |           |       |    |    |    |    |    |    |    |    |    |   |   |   |
|-------------------------------------|-----------|-------|----|----|----|----|----|----|----|----|----|---|---|---|
|                                     | 2006      |       |    |    |    |    |    |    |    |    |    |   |   |   |
| WILMINGTON, DE, USA                 | 1985-2006 | 23455 | 31 | 26 | 21 | 23 | 18 | 14 | 16 | 11 | 9  | 7 | 5 | 3 |
| WORCESTER, MA, USA                  | 1985-2006 | 41347 | 34 | 28 | 24 | 25 | 20 | 16 | 15 | 11 | 8  | 7 | 5 | 3 |
| WEST PALM BEACH-BOCA RATON, FL, USA | 1985-2006 | 72824 | 37 | 30 | 25 | 25 | 19 | 15 | 17 | 11 | 8  | 9 | 5 | 3 |
| YORK, PA, USA                       | 1985-2006 | 19280 | 32 | 26 | 21 | 25 | 20 | 16 | 16 | 12 | 9  | 8 | 6 | 4 |
| YOUNGSTOWN-WARREN, OH, USA          | 1985-2006 | 26632 | 30 | 25 | 21 | 23 | 19 | 15 | 16 | 12 | 10 | 7 | 5 | 4 |
| HO CHI MINH CITY, VIETNAM           | 2010-2013 | 33722 | 31 | 25 | 21 | 22 | 17 | 15 | 15 | 12 | 11 | 8 | 7 | 6 |
| HUE, VIETNAM                        | 2009-2013 | 1933  | 33 | 28 | 24 | 22 | 18 | 14 | 16 | 11 | 8  | 8 | 4 | 3 |

Table S2: Second-stage random-effects meta-analysis and meta-regression models for explaining variation in overall heatwave effects and added heatwave effects: Cochran Q test for heterogeneity,  $I^2$  statistics for residual heterogeneity. Please refer table 1 for heatwave definitions.

| Heatwave definition | Model                   | Predictor               | <i>Overall heatwave effect</i> |           | <i>Added heatwave effect</i> |           |
|---------------------|-------------------------|-------------------------|--------------------------------|-----------|------------------------------|-----------|
|                     |                         |                         | P value for Q test             | $I^2$ (%) | P value for Q test           | $I^2$ (%) |
| 90P_2day            | Intercept only          | -----                   | <0.001                         | 73.33     | 0.372                        | 2.12      |
|                     | Single predictor        | Average temperature     | <0.001                         | 70.83     | 0.376                        | 2.04      |
|                     |                         | Temperature range       | <0.001                         | 73.40     | 0.399                        | 1.63      |
|                     |                         | Temperature variability | <0.001                         | 73.03     | 0.412                        | 1.39      |
|                     |                         | Longitude               | <0.001                         | 72.26     | 0.359                        | 2.35      |
|                     |                         | Latitude                | <0.001                         | 72.16     | 0.361                        | 2.31      |
|                     |                         | Country                 | <0.001                         | 44.72     | 0.335                        | 2.86      |
|                     |                         | Full                    | Average temperature            |           |                              |           |
|                     | Temperature range       |                         |                                |           |                              |           |
|                     | Temperature variability |                         | <0.001                         | 43.99     | 0.402                        | 1.61      |
|                     | Longitude               |                         |                                |           |                              |           |
|                     |                         | Latitude                |                                |           |                              |           |
|                     |                         | Country                 |                                |           |                              |           |
| 92.5P_2day          | Intercept only          | -----                   | <0.001                         | 74.37     | 0.031                        | 12.03     |
|                     | Single predictor        | Average temperature     | <0.001                         | 72.84     | 0.038                        | 11.42     |
|                     |                         | Temperature range       | <0.001                         | 74.34     | 0.030                        | 12.11     |
|                     |                         | Temperature variability | <0.001                         | 73.52     | 0.028                        | 12.25     |
|                     |                         | Longitude               | <0.001                         | 73.72     | 0.028                        | 12.25     |
|                     |                         | Latitude                | <0.001                         | 73.61     | 0.028                        | 12.24     |
|                     |                         | Country                 | <0.001                         | 46.52     | 0.024                        | 12.87     |
|                     |                         | Full                    | Average temperature            |           |                              |           |



|            |                  |                         |        |       |       |       |
|------------|------------------|-------------------------|--------|-------|-------|-------|
|            |                  | Temperature range       |        |       |       |       |
|            |                  | Temperature variability | <0.001 | 43.83 | 0.030 | 12.39 |
|            |                  | Longitude               |        |       |       |       |
|            |                  | Latitude                |        |       |       |       |
|            |                  | Country                 |        |       |       |       |
| 95P_2day   | Intercept only   | -----                   | <0.001 | 74.99 | 0.095 | 8.59  |
|            | Single predictor | Average temperature     | <0.001 | 74.51 | 0.108 | 8.13  |
|            |                  | Temperature range       | <0.001 | 74.91 | 0.149 | 6.88  |
|            |                  | Temperature variability | <0.001 | 74.20 | 0.116 | 7.88  |
|            |                  | Longitude               | <0.001 | 74.65 | 0.100 | 8.40  |
|            |                  | Latitude                | <0.001 | 74.61 | 0.090 | 8.78  |
|            |                  | Country                 | <0.001 | 49.54 | 0.082 | 9.28  |
|            | Full             | Average temperature     |        |       |       |       |
|            |                  | Temperature range       |        |       |       |       |
|            |                  | Temperature variability | <0.001 | 46.66 | 0.097 | 8.72  |
|            |                  | Longitude               |        |       |       |       |
|            |                  | Latitude                |        |       |       |       |
|            |                  | Country                 |        |       |       |       |
| 97.5P_2day | Intercept only   | -----                   | <0.001 | 73.99 | 0.038 | 11.47 |
|            | Single predictor | Average temperature     | <0.001 | 74.02 | 0.038 | 11.47 |
|            |                  | Temperature range       | <0.001 | 73.73 | 0.074 | 9.45  |
|            |                  | Temperature variability | <0.001 | 73.43 | 0.057 | 10.30 |
|            |                  | Longitude               | <0.001 | 74.03 | 0.043 | 11.11 |
|            |                  | Latitude                | <0.001 | 73.92 | 0.053 | 10.48 |
|            |                  | Country                 | <0.001 | 51.82 | 0.089 | 9.00  |
|            | Full             | Average temperature     |        |       |       |       |
|            |                  | Temperature range       |        |       |       |       |
|            |                  | Temperature variability | <0.001 | 47.79 | 0.080 | 9.42  |
|            |                  | Longitude               |        |       |       |       |

|            |                         | Latitude                |                     |       |       |       |
|------------|-------------------------|-------------------------|---------------------|-------|-------|-------|
|            |                         | Country                 |                     |       |       |       |
| 90P_3day   | Intercept only          | -----                   | <0.001              | 72.33 | 0.765 | 5.48  |
|            | Single predictor        | Average temperature     | <0.001              | 70.14 | 0.775 | 5.72  |
|            |                         | Temperature range       | <0.001              | 72.40 | 0.817 | 6.86  |
|            |                         | Temperature variability | <0.001              | 71.92 | 0.809 | 6.65  |
|            |                         | Longitude               | <0.001              | 71.40 | 0.754 | 5.22  |
|            |                         | Latitude                | <0.001              | 71.01 | 0.765 | 5.48  |
|            |                         | Country                 | <0.001              | 44.87 | 0.868 | 8.75  |
|            |                         | Full                    | Average temperature |       |       |       |
|            | Temperature range       |                         |                     |       |       |       |
|            | Temperature variability |                         | <0.001              | 43.93 | 0.876 | 9.12  |
|            | Longitude               |                         |                     |       |       |       |
|            | Latitude                |                         |                     |       |       |       |
|            |                         | Country                 |                     |       |       |       |
| 92.5P_3day | Intercept only          | -----                   | <0.001              | 73.31 | 0.458 | 0.58  |
|            | Single predictor        | Average temperature     | <0.001              | 72.18 | 0.508 | -0.31 |
|            |                         | Temperature range       | <0.001              | 73.24 | 0.464 | 0.48  |
|            |                         | Temperature variability | <0.001              | 72.32 | 0.448 | 0.76  |
|            |                         | Longitude               | <0.001              | 72.83 | 0.449 | 0.74  |
|            |                         | Latitude                | <0.001              | 72.61 | 0.450 | 0.73  |
|            |                         | Country                 | <0.001              | 46.88 | 0.574 | 1.53  |
|            |                         | Full                    | Average temperature |       |       |       |
|            | Temperature range       |                         |                     |       |       |       |
|            | Temperature variability |                         | <0.001              | 43.40 | 0.585 | 1.76  |
|            | Longitude               |                         |                     |       |       |       |
|            | Latitude                |                         |                     |       |       |       |
|            |                         | Country                 |                     |       |       |       |
| 95P_3day   | Intercept only          | -----                   | <0.001              | 73.52 | 0.091 | 8.73  |

|            |                  |                         |        |       |       |      |
|------------|------------------|-------------------------|--------|-------|-------|------|
|            | Single predictor | Average temperature     | <0.001 | 73.32 | 0.103 | 8.31 |
|            |                  | Temperature range       | <0.001 | 73.42 | 0.133 | 7.34 |
|            |                  | Temperature variability | <0.001 | 72.76 | 0.103 | 8.32 |
|            |                  | Longitude               | <0.001 | 73.37 | 0.088 | 8.87 |
|            |                  | Latitude                | <0.001 | 73.23 | 0.090 | 8.77 |
|            |                  | Country                 | <0.001 | 51.82 | 0.111 | 8.18 |
|            | Full             | Average temperature     |        |       |       |      |
|            |                  | Temperature range       |        |       |       |      |
|            |                  | Temperature variability | <0.001 | 48.36 | 0.132 | 7.55 |
|            |                  | Longitude               |        |       |       |      |
|            |                  | Latitude                |        |       |       |      |
|            |                  | Country                 |        |       |       |      |
| 97.5P_3day | Intercept only   | -----                   | <0.001 | 71.16 | 0.207 | 5.42 |
|            | Single predictor | Average temperature     | <0.001 | 71.12 | 0.201 | 5.56 |
|            |                  | Temperature range       | <0.001 | 70.89 | 0.258 | 4.32 |
|            |                  | Temperature variability | <0.001 | 70.66 | 0.235 | 4.79 |
|            |                  | Longitude               | <0.001 | 71.23 | 0.197 | 5.65 |
|            |                  | Latitude                | <0.001 | 71.13 | 0.278 | 3.89 |
|            |                  | Country                 | <0.001 | 50.05 | 0.367 | 2.25 |
|            | Full             | Average temperature     |        |       |       |      |
|            |                  | Temperature range       |        |       |       |      |
|            |                  | Temperature variability | <0.001 | 45.41 | 0.436 | 0.99 |
|            |                  | Longitude               |        |       |       |      |
|            |                  | Latitude                |        |       |       |      |
|            |                  | Country                 |        |       |       |      |
| 90P_4day   | Intercept only   | -----                   | <0.001 | 70.58 | 0.278 | 3.90 |
|            | Single predictor | Average temperature     | <0.001 | 68.76 | 0.286 | 3.73 |
|            |                  | Temperature range       | <0.001 | 70.65 | 0.336 | 2.79 |
|            |                  | Temperature variability | <0.001 | 70.02 | 0.317 | 3.15 |

|            |                  |                         |        |       |       |       |
|------------|------------------|-------------------------|--------|-------|-------|-------|
|            |                  | Longitude               | <0.001 | 69.79 | 0.266 | 4.14  |
|            |                  | Latitude                | <0.001 | 69.37 | 0.271 | 4.05  |
|            |                  | Country                 | <0.001 | 44.25 | 0.436 | 0.98  |
|            | Full             | Average temperature     |        |       |       |       |
|            |                  | Temperature range       |        |       |       |       |
|            |                  | Temperature variability | <0.001 | 42.50 | 0.465 | 0.45  |
|            |                  | Longitude               |        |       |       |       |
|            |                  | Latitude                |        |       |       |       |
|            |                  | Country                 |        |       |       |       |
| 92.5P_4day | Intercept only   | -----                   | <0.001 | 72.05 | 0.086 | 8.95  |
|            | Single predictor | Average temperature     | <0.001 | 71.42 | 0.089 | 8.83  |
|            |                  | Temperature range       | <0.001 | 71.97 | 0.096 | 8.57  |
|            |                  | Temperature variability | <0.001 | 71.10 | 0.086 | 8.96  |
|            |                  | Longitude               | <0.001 | 71.79 | 0.086 | 8.95  |
|            |                  | Latitude                | <0.001 | 71.44 | 0.089 | 8.82  |
|            |                  | Country                 | <0.001 | 47.65 | 0.173 | 6.37  |
|            | Full             | Average temperature     |        |       |       |       |
|            |                  | Temperature range       |        |       |       |       |
|            |                  | Temperature variability | <0.001 | 43.27 | 0.217 | 5.33  |
|            |                  | Longitude               |        |       |       |       |
|            |                  | Latitude                |        |       |       |       |
|            |                  | Country                 |        |       |       |       |
| 95P_4day   | Intercept only   | -----                   | <0.001 | 73.19 | 0.036 | 11.59 |
|            | Single predictor | Average temperature     | <0.001 | 73.16 | 0.038 | 11.44 |
|            |                  | Temperature range       | <0.001 | 73.03 | 0.044 | 11.05 |
|            |                  | Temperature variability | <0.001 | 72.45 | 0.035 | 11.65 |
|            |                  | Longitude               | <0.001 | 73.14 | 0.035 | 11.66 |
|            |                  | Latitude                | <0.001 | 73.00 | 0.042 | 11.15 |
|            |                  | Country                 | <0.001 | 54.10 | 0.100 | 8.59  |

|            |                  |                         |        |       |       |       |
|------------|------------------|-------------------------|--------|-------|-------|-------|
|            | Full             | Average temperature     |        |       |       |       |
|            |                  | Temperature range       |        |       |       |       |
|            |                  | Temperature variability | <0.001 | 50.15 | 0.102 | 8.57  |
|            |                  | Longitude               |        |       |       |       |
|            |                  | Latitude                |        |       |       |       |
|            |                  | Country                 |        |       |       |       |
| 97.5P_4day | Intercept only   | -----                   | <0.001 | 69.31 | 0.004 | 16.34 |
|            | Single predictor | Average temperature     | <0.001 | 69.01 | 0.004 | 16.47 |
|            |                  | Temperature range       | <0.001 | 68.95 | 0.005 | 16.28 |
|            |                  | Temperature variability | <0.001 | 68.86 | 0.005 | 16.26 |
|            |                  | Longitude               | <0.001 | 69.37 | 0.004 | 16.37 |
|            |                  | Latitude                | <0.001 | 69.39 | 0.005 | 16.00 |
|            |                  | Country                 | <0.001 | 48.71 | 0.011 | 14.69 |
|            | Full             | Average temperature     |        |       |       |       |
|            |                  | Temperature range       |        |       |       |       |
|            |                  | Temperature variability | <0.001 | 44.06 | 0.019 | 13.57 |
|            |                  | Longitude               |        |       |       |       |
|            |                  | Latitude                |        |       |       |       |
|            |                  | Country                 |        |       |       |       |

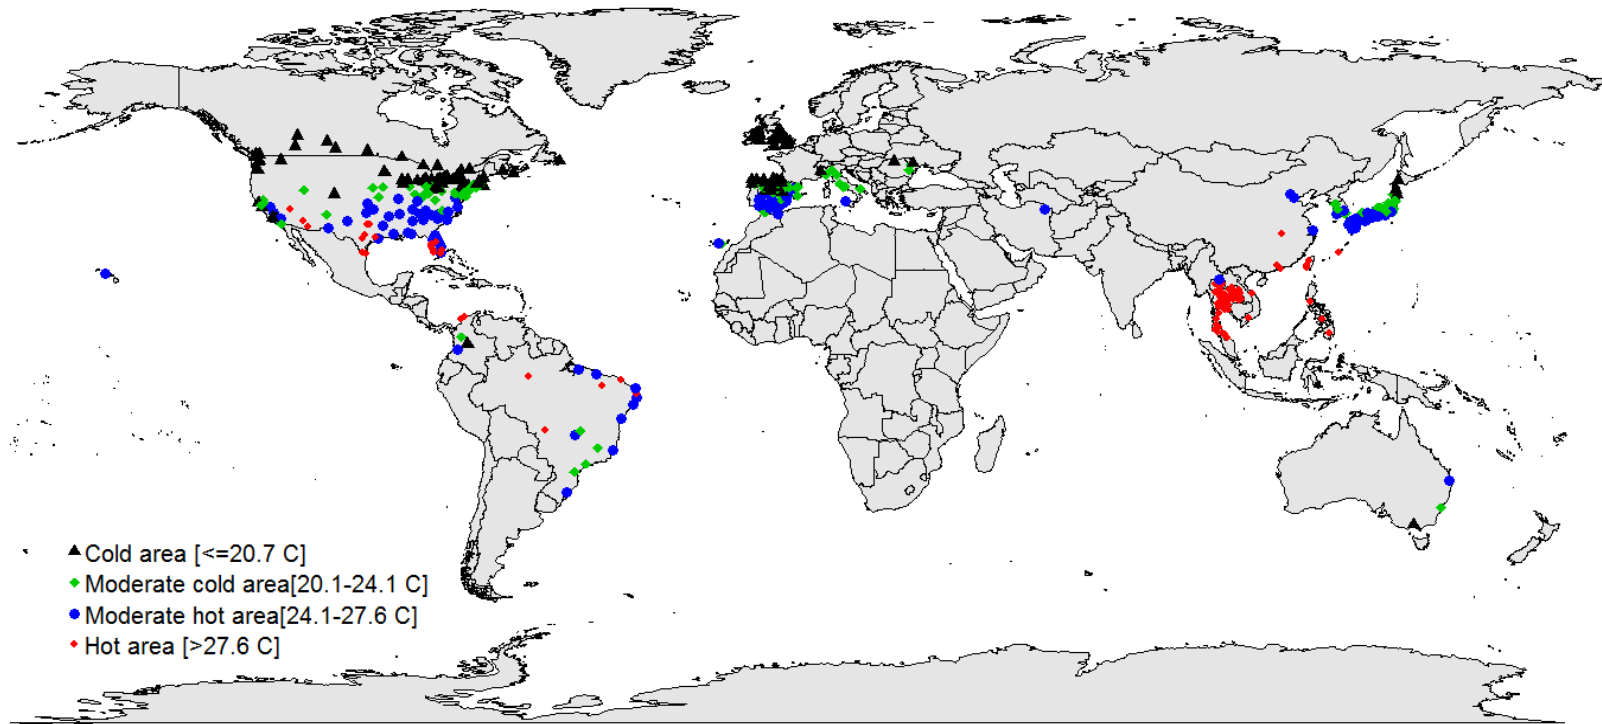

Figure S1: Locations of communities stratified by cold, moderate cold, moderate hot and hot areas, by the quantiles ( $\leq 25^{\text{th}}$ ,  $25^{\text{th}}-50^{\text{th}}$ ,  $50^{\text{th}}-75^{\text{th}}$ , and  $> 75^{\text{th}}$ ) of their mean temperatures of hot season (each community has one value of annual mean temperature).

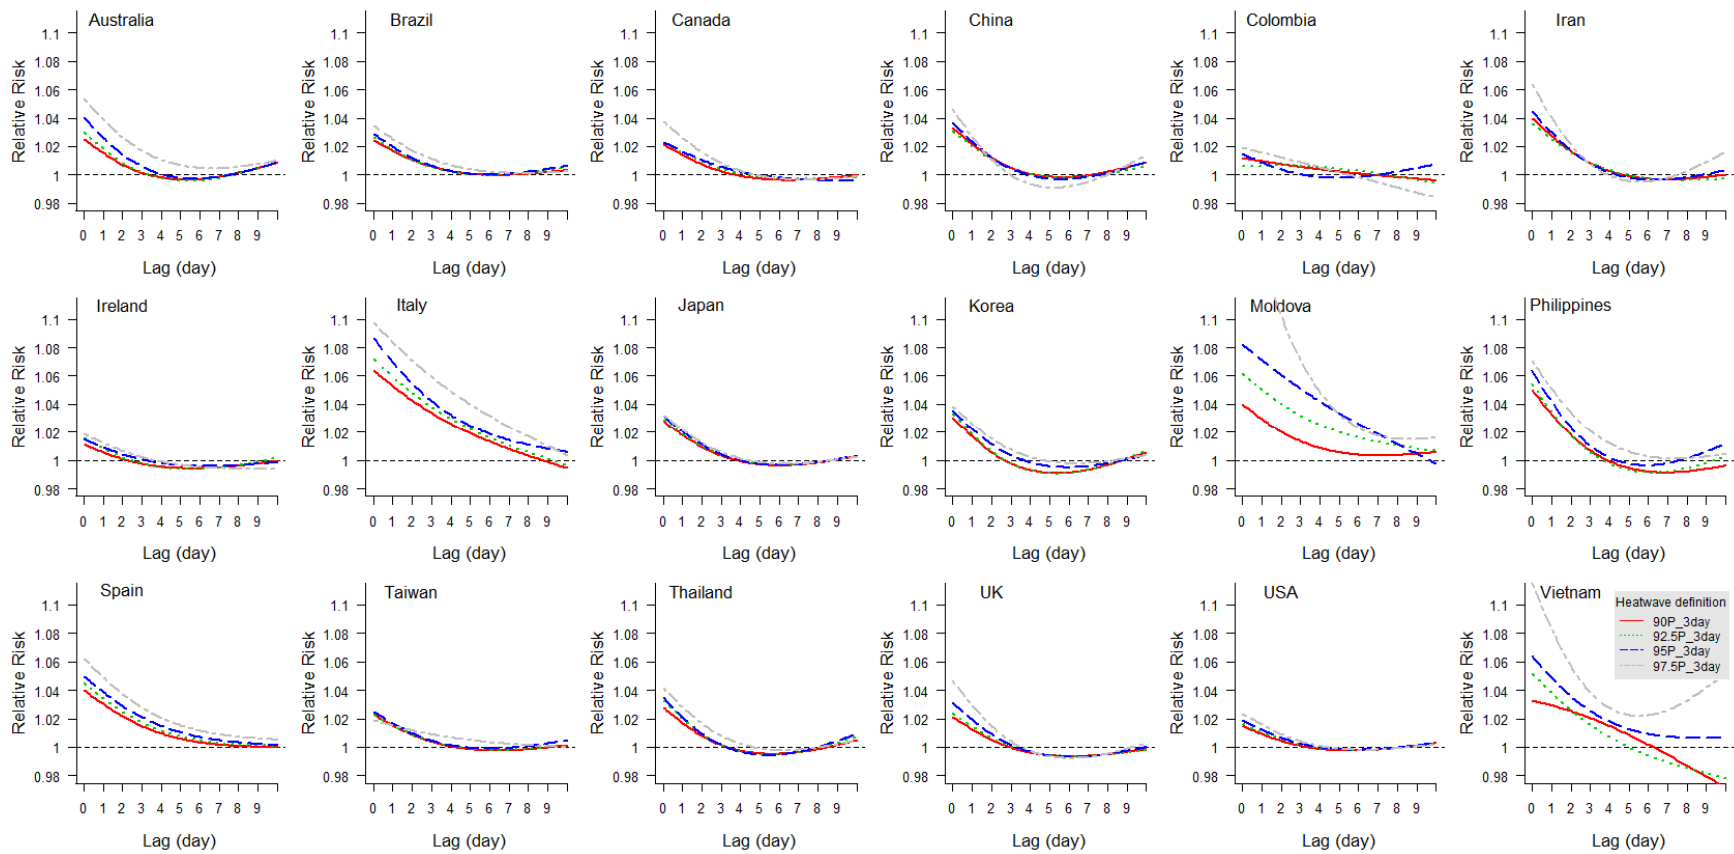

Figure S2: Lag effects of heatwaves on mortality along lag 0–10 days in 18 countries/regions for 4 types of heatwave definitions. 90P\_3day: 90<sup>th</sup> percentile with  $\geq 3$  days duration; 92.5P\_3day: 92.5<sup>th</sup> percentile with  $\geq 3$  days duration; 95P\_3day: 95<sup>th</sup> percentile with  $\geq 3$  days duration; 97.5P\_3day: 97.5<sup>th</sup> percentile with  $\geq 3$  days duration.

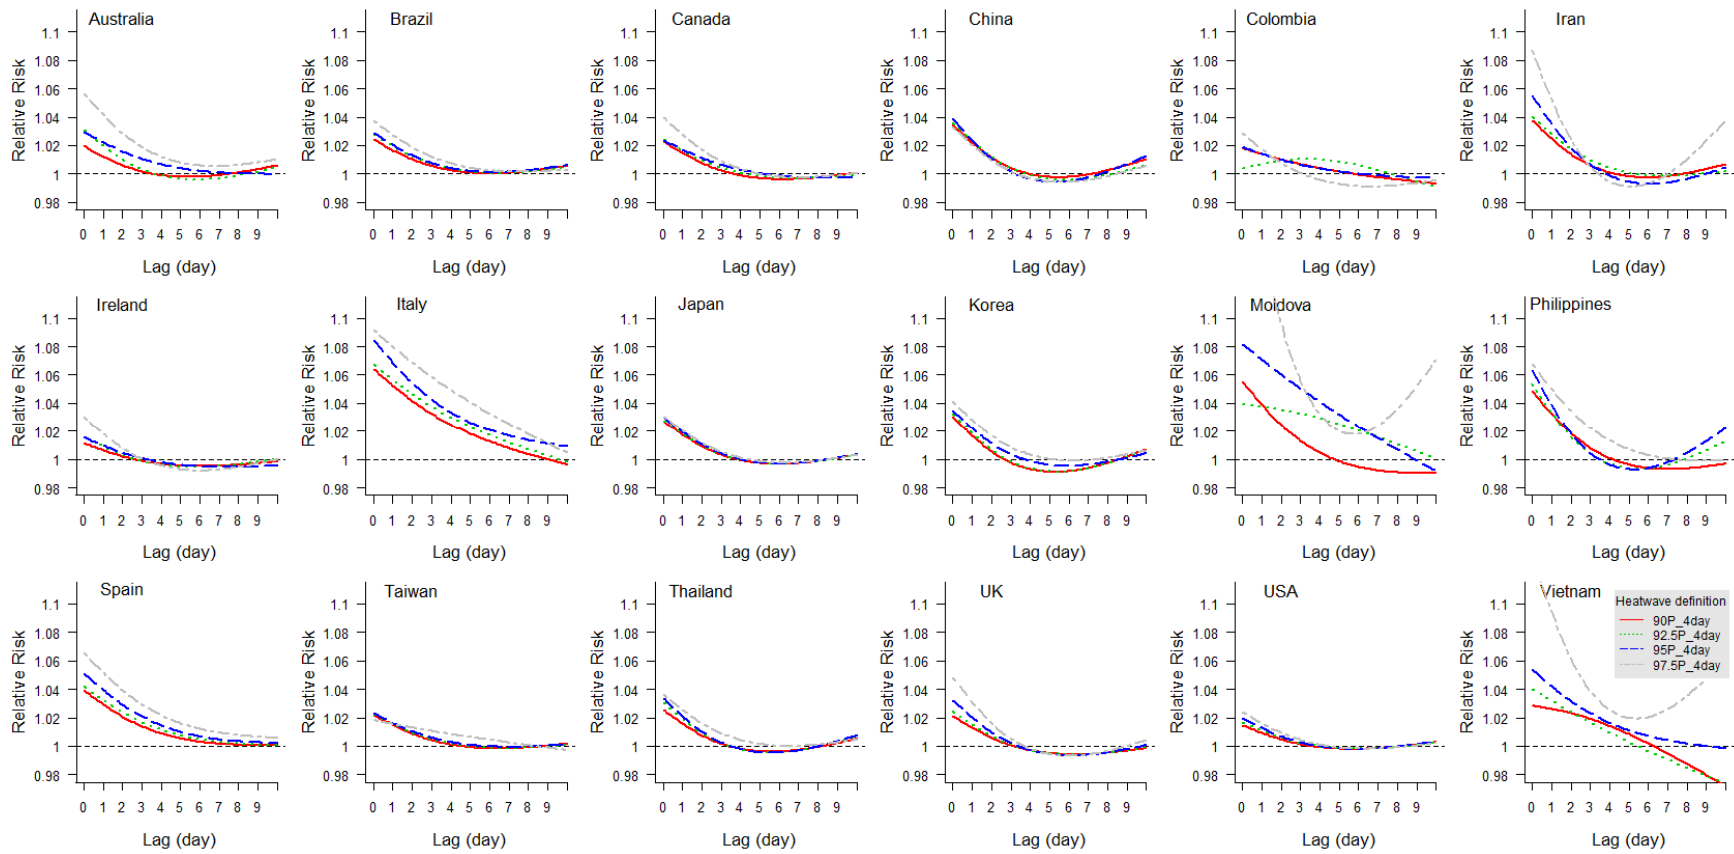

Figure S3: Lag effects of heatwaves on mortality along lag 0–10 days in 18 countries/regions for 4 types of heatwave definitions. 90P\_4day: 90<sup>th</sup> percentile with  $\geq 4$  days duration; 92.5P\_4day: 92.5<sup>th</sup> percentile with  $\geq 4$  days duration; 95P\_4day: 95<sup>th</sup> percentile with  $\geq 4$  days duration; 97.5P\_4day: 97.5<sup>th</sup> percentile with  $\geq 4$  days duration.



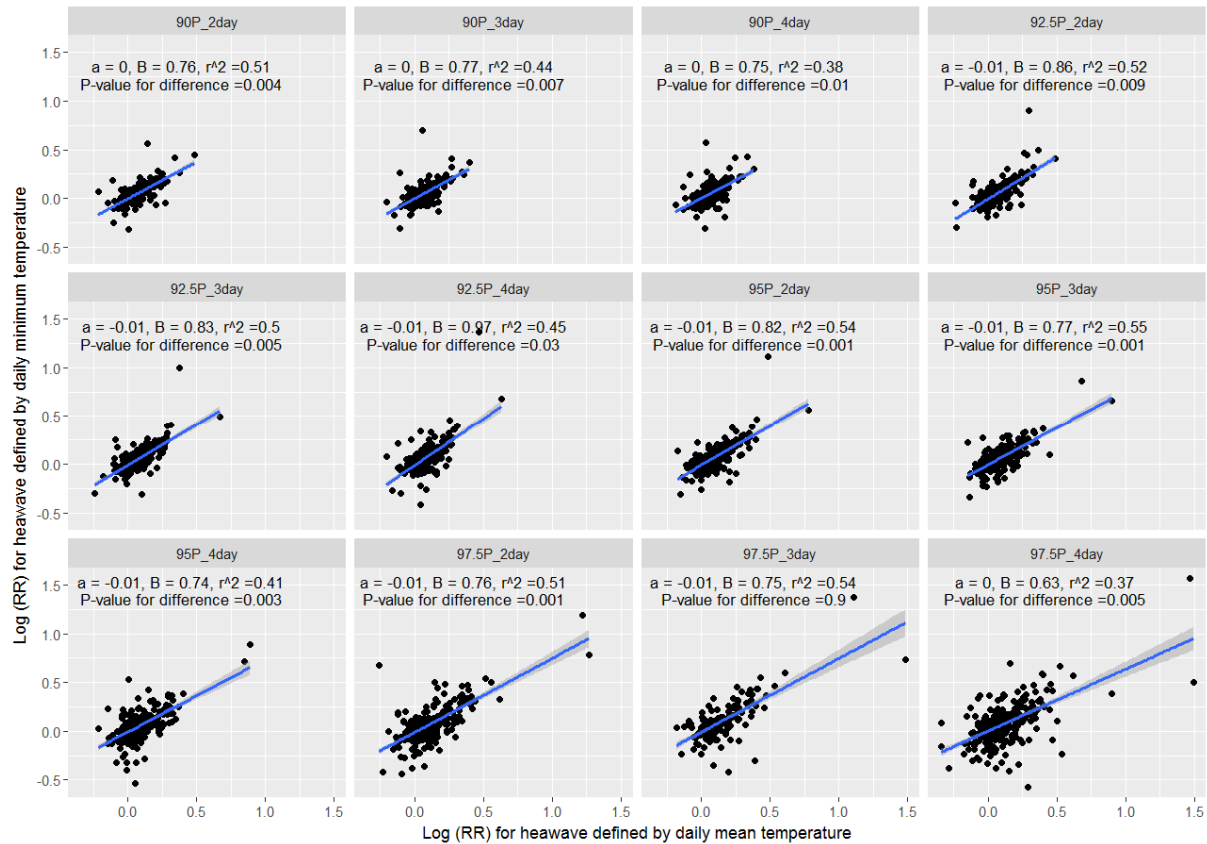

Figure S4: Comparison for cumulative effects of heatwaves on mortality over lag 0–10 days in 16 countries/regions for 12 types of heatwave definitions using daily mean and minimum temperatures. Please refer table 1 for heatwave definitions. a, B, and r<sup>2</sup> are intercept, coefficient, and r-squared respectively derived from linear regression model for effect estimates modelled by heatwaves defined by daily mean and minimum temperatures. P-value for difference is modelled by the Paired t-test between effect estimates modelled by heatwaves defined by daily mean and minimum temperatures.

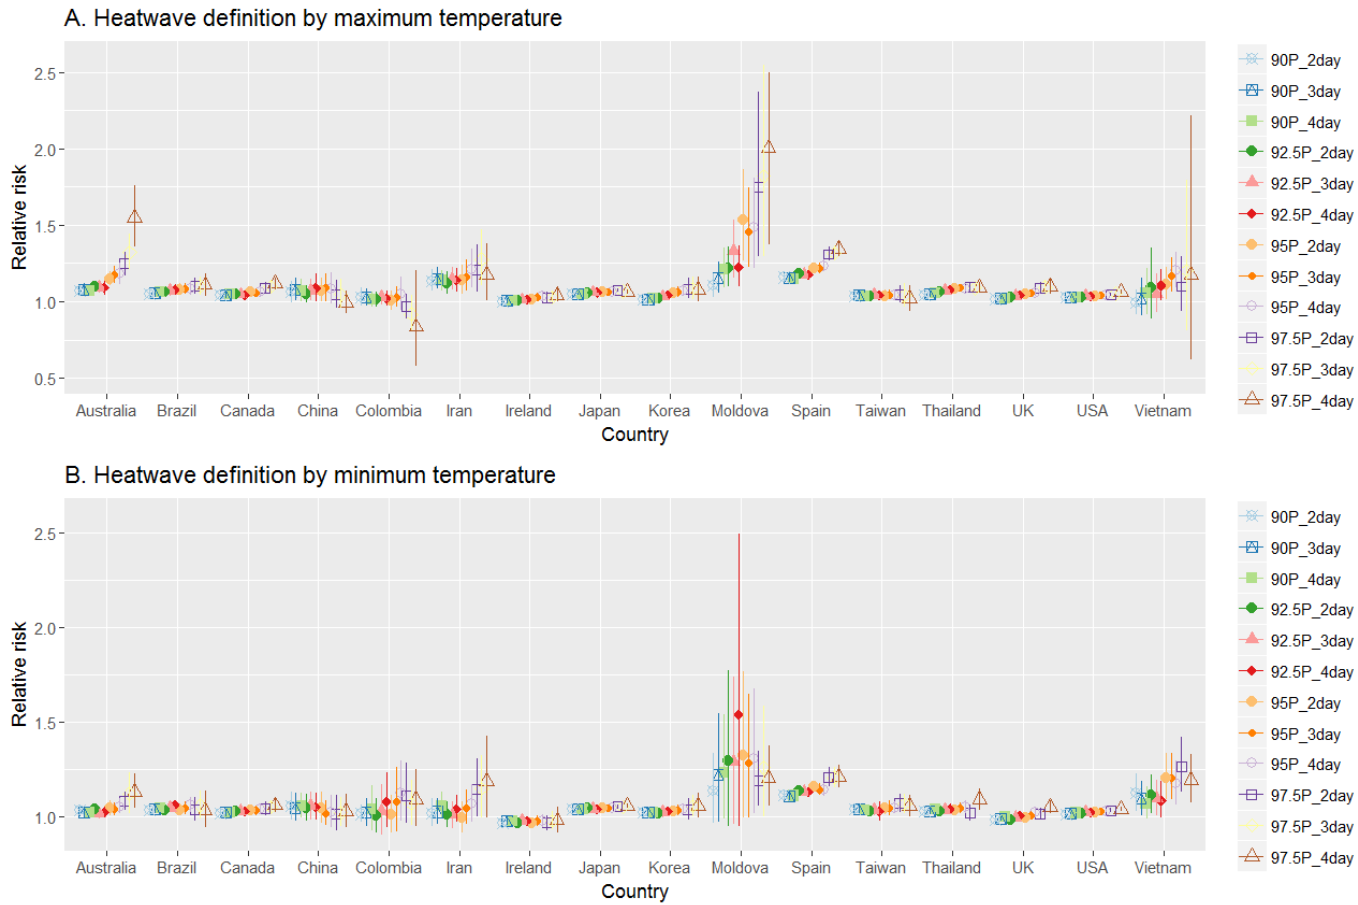

Figure S5: Cumulative effects of heatwaves (A. definition by maximum temperature and B. definition by minimum temperature) on mortality over lag 0–10 days in 18 countries/regions for 12 types of heatwave definitions. Please refer table 1 for heatwave definitions.

Remove USA

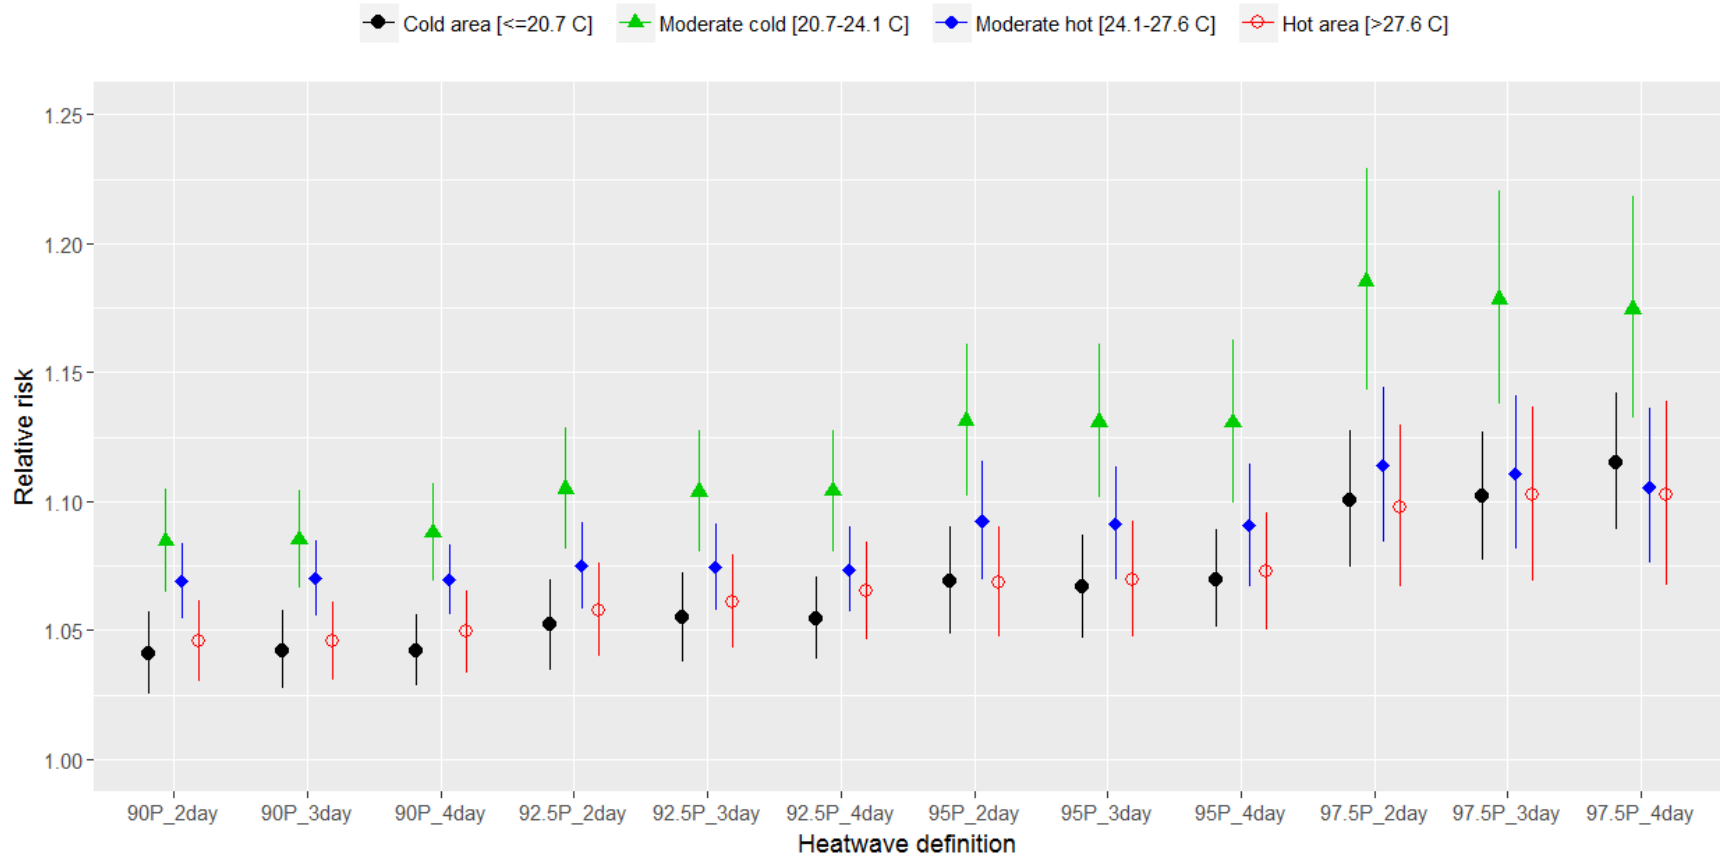

F

Figure S6: Cumulative effects of heatwaves on mortality over lag 0–10 days in 4 climatic areas (cold, moderate cold, moderate hot, and hot areas) for 12 types of heatwave definitions when excluding USA. Cold areas: mean temperature of hot season  $\leq 20.7$  °C; moderate cold areas: mean temperature of hot season 20.7–24.1 °C; moderate hot areas: mean temperature of hot season 24.1–27.6 °C; and hot areas: mean temperature of hot season  $> 27.6$  °C. Please refer table 1 for heatwave definitions.

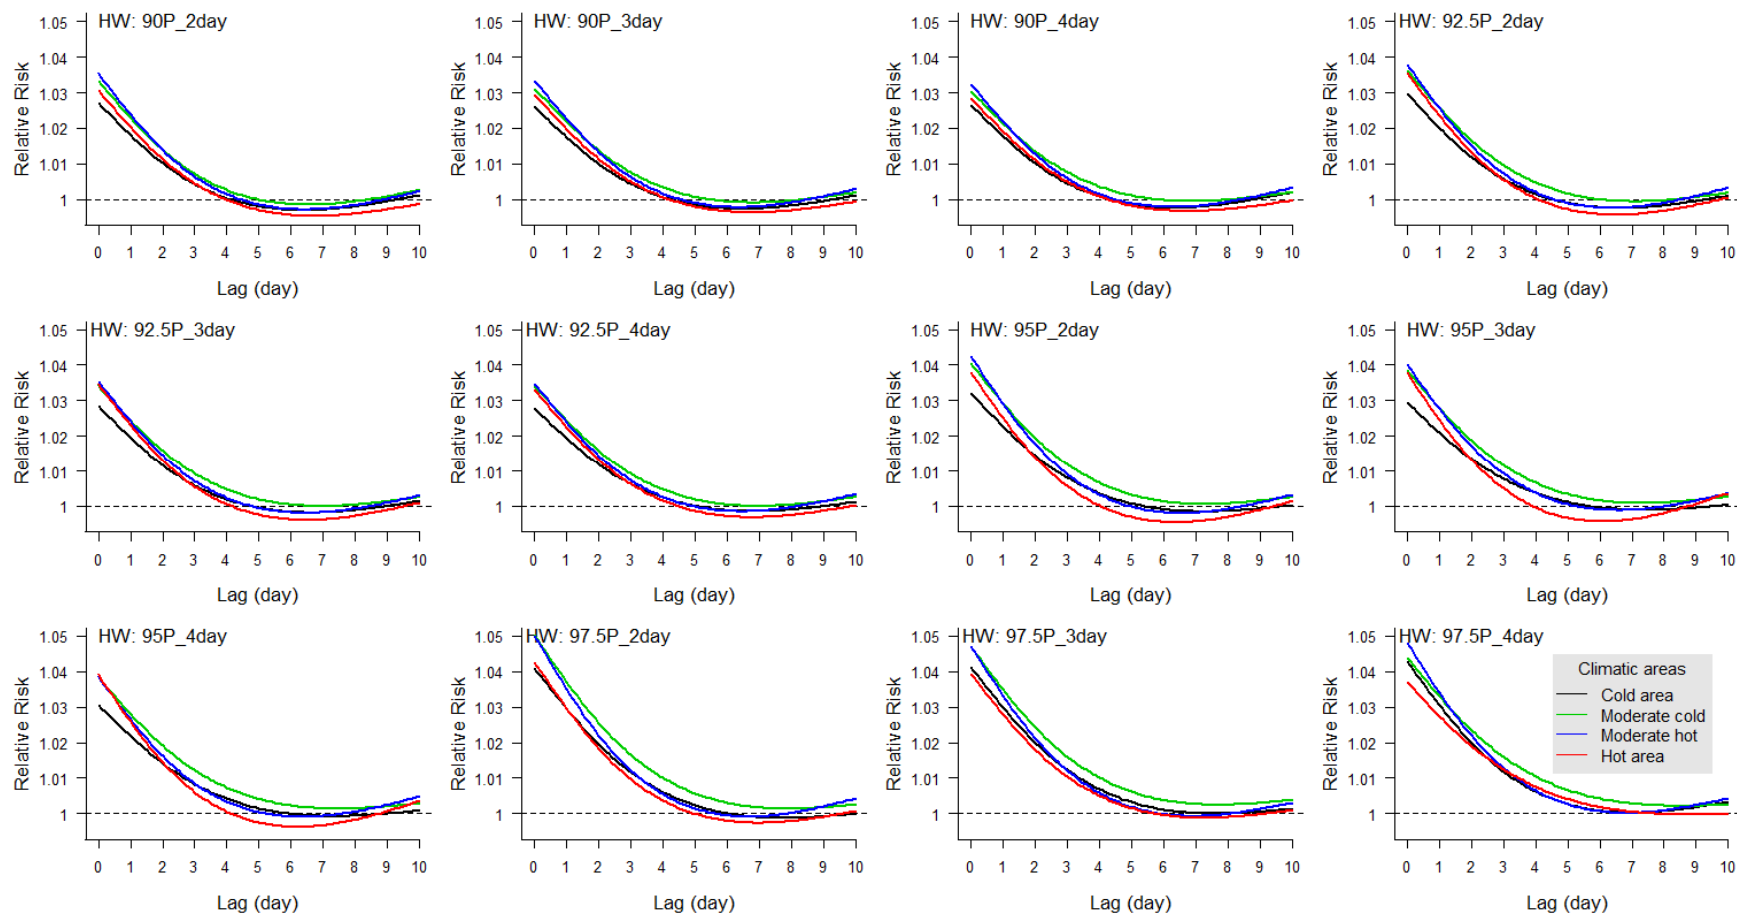

Figure S7: Lag effects of heatwaves on mortality along lag 0–10 days in 4 climatic areas (cold, moderate cold, moderate hot, and hot areas) for 12 types of heatwave definitions when excluding USA. Cold areas: mean temperature of hot season  $\leq 20.7$  °C; moderate cold areas: mean temperature of hot season 20.7–24.1 °C; moderate hot areas: mean temperature of hot season 24.1–27.6 °C; and hot areas: mean temperature of hot season  $>27.6$  °C. Please refer table 1 for heatwave definitions.

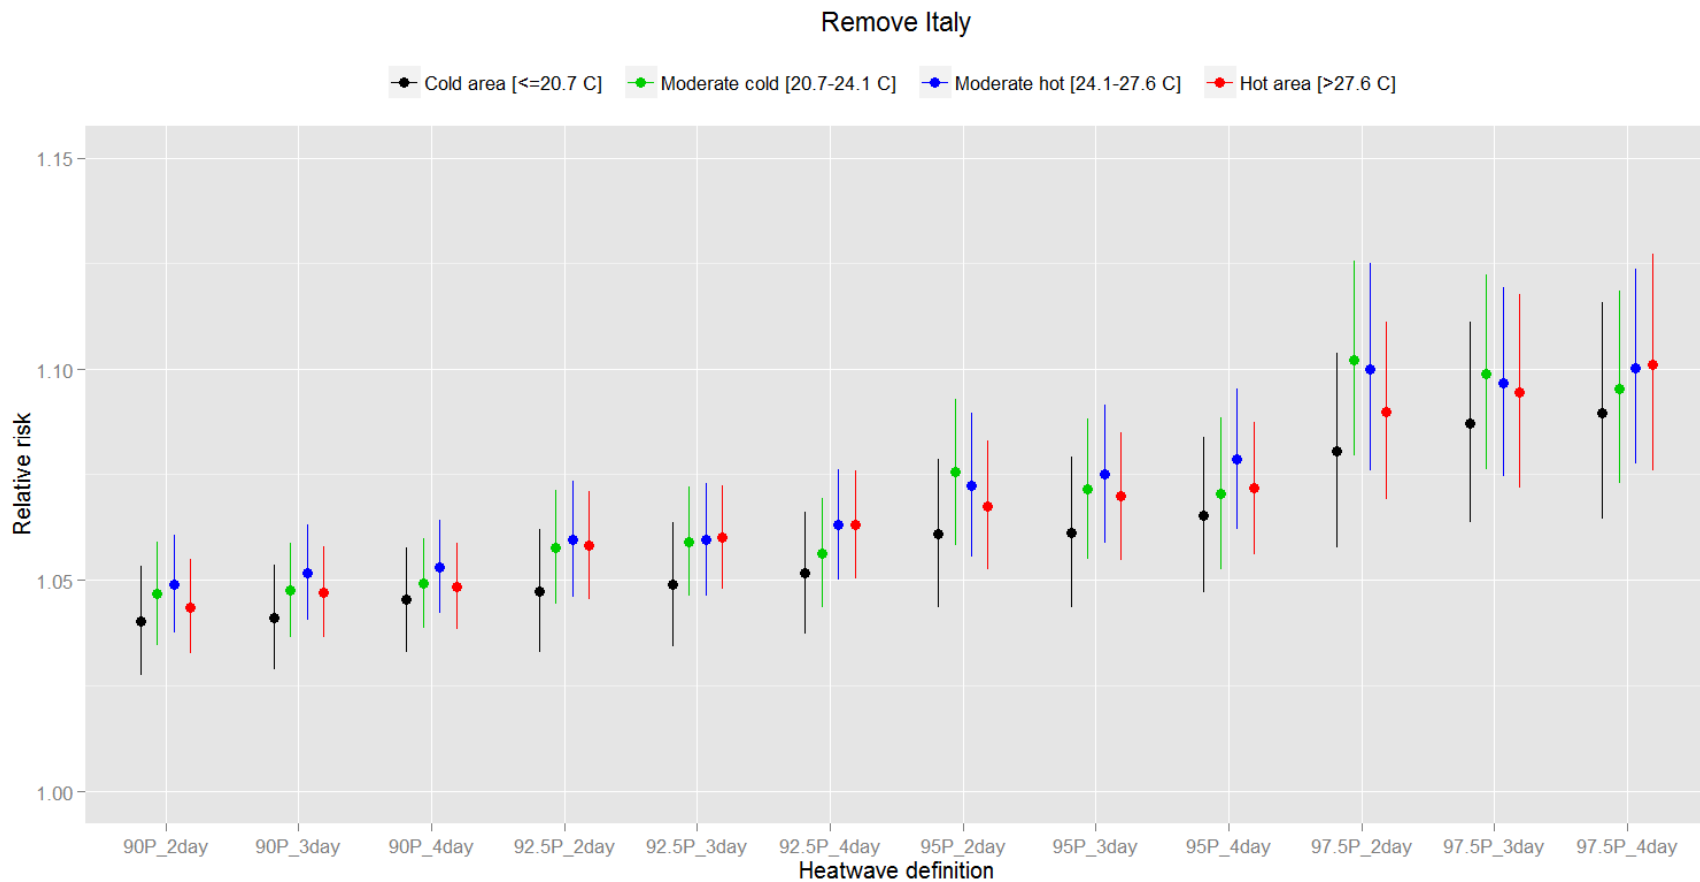

Figure S8: Cumulative effects of heatwaves on mortality over lag 0–10 days in 4 climatic areas (cold, moderate cold, moderate hot, and hot areas) for 12 types of heatwave definitions when excluding Italy. Cold areas: mean temperature of hot season  $\leq 20.7$  °C; moderate cold areas: mean temperature of hot season 20.7–24.1 °C; moderate hot areas: mean temperature of hot season 24.1–27.6 °C; and hot areas: mean temperature of hot season  $> 27.6$  °C. Please refer table 1 for heatwave definitions.

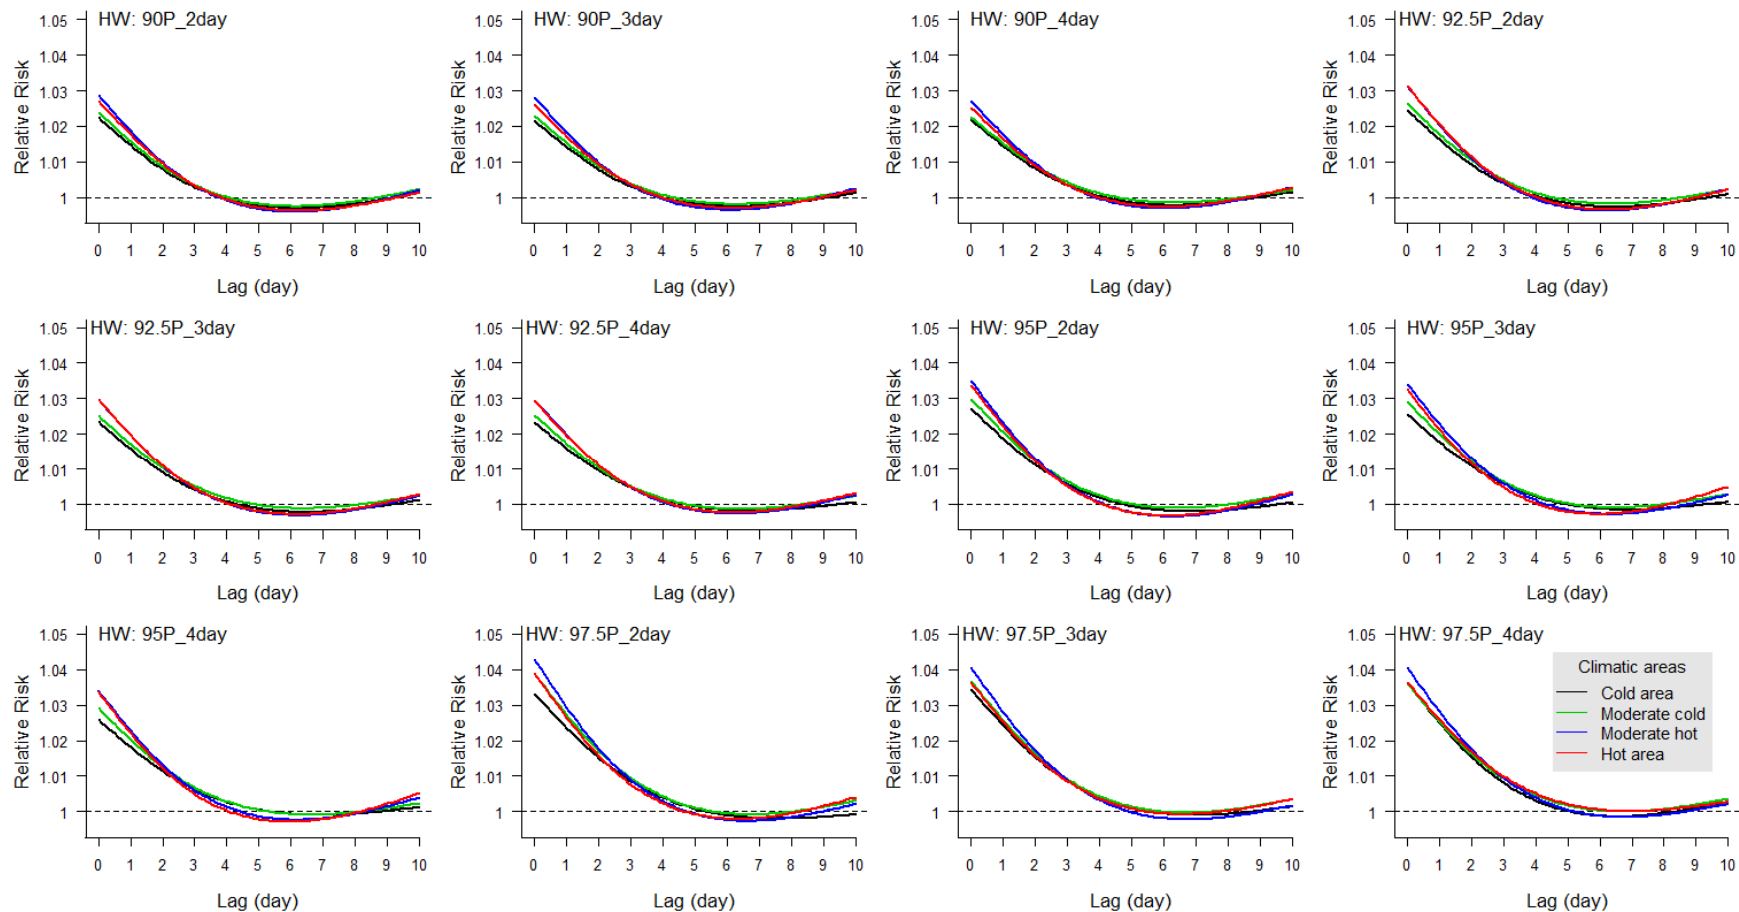

Figure S9: Lag effects of heatwaves on mortality along lag 0–10 days in 4 climatic areas (cold, moderate cold, moderate hot, and hot areas) for 12 types of heatwave definitions when excluding Italy. Cold areas: mean temperature of hot season  $\leq 20.7$  °C; moderate cold areas: mean temperature of hot season 20.7–24.1 °C; moderate hot areas: mean temperature of hot season 24.1–27.6 °C; and hot areas: mean temperature of hot season  $>27.6$  °C. Please refer table 1 for heatwave definitions.

### Remove Moldova

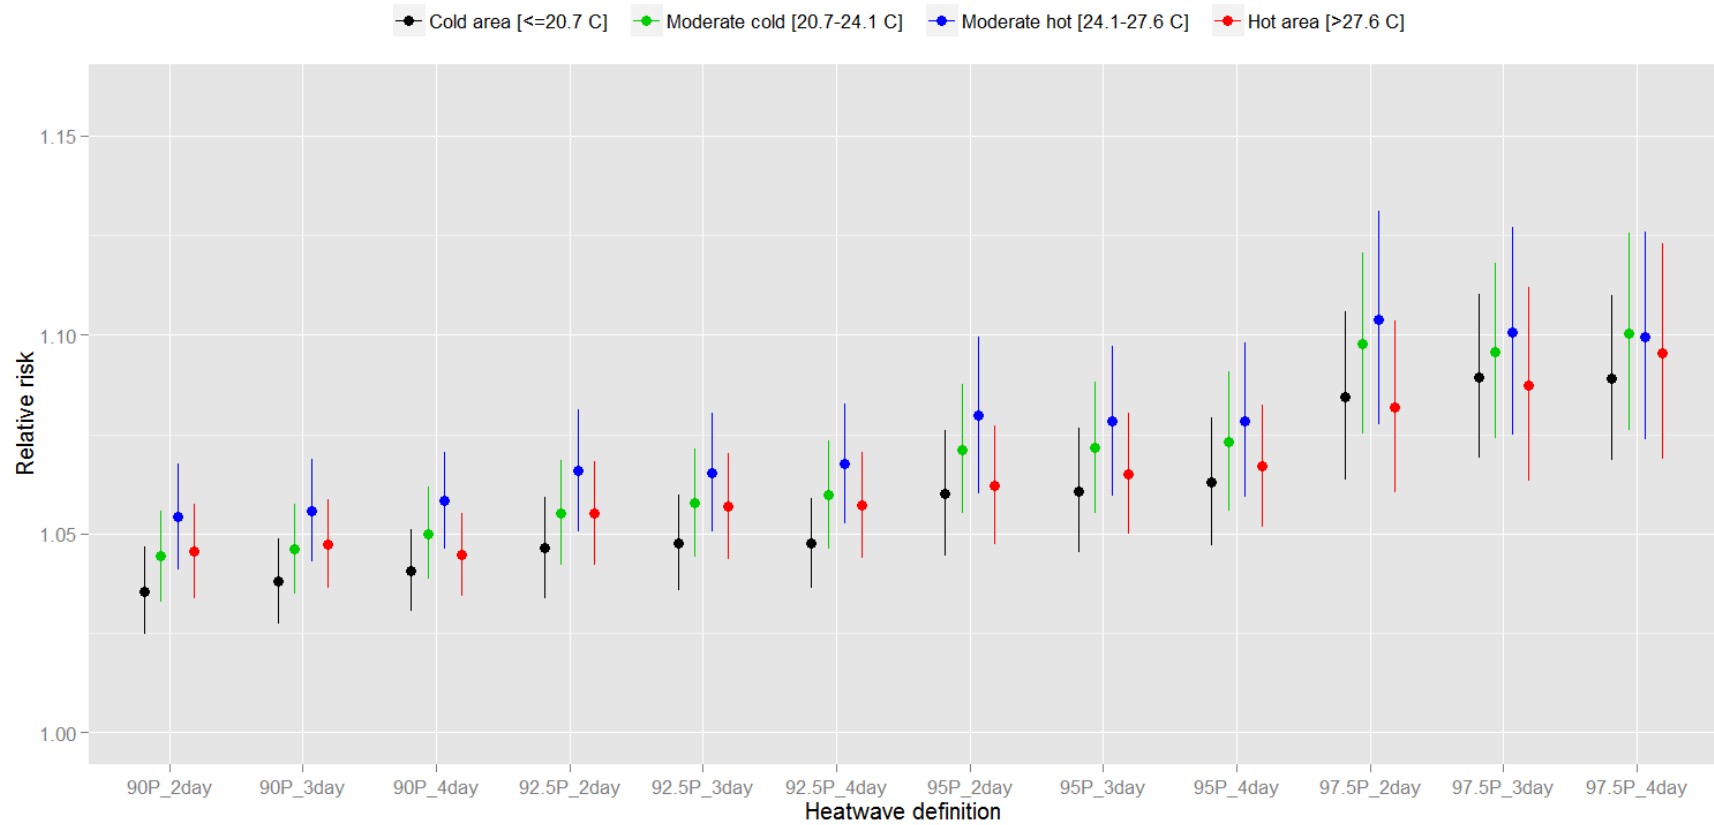

Figure S10: Cumulative effects of heatwaves on mortality over lag 0–10 days in 4 climatic areas (cold, moderate cold, moderate hot, and hot areas) for 12 types of heatwave definitions when excluding Moldova. Cold areas: mean temperature of hot season  $\leq 20.7$  °C; moderate cold areas: mean temperature of hot season 20.7–24.1 °C; moderate hot areas: mean temperature of hot season 24.1–27.6 °C; and hot areas: mean temperature of hot season  $> 27.6$  °C. Please refer table 1 for heatwave definitions.

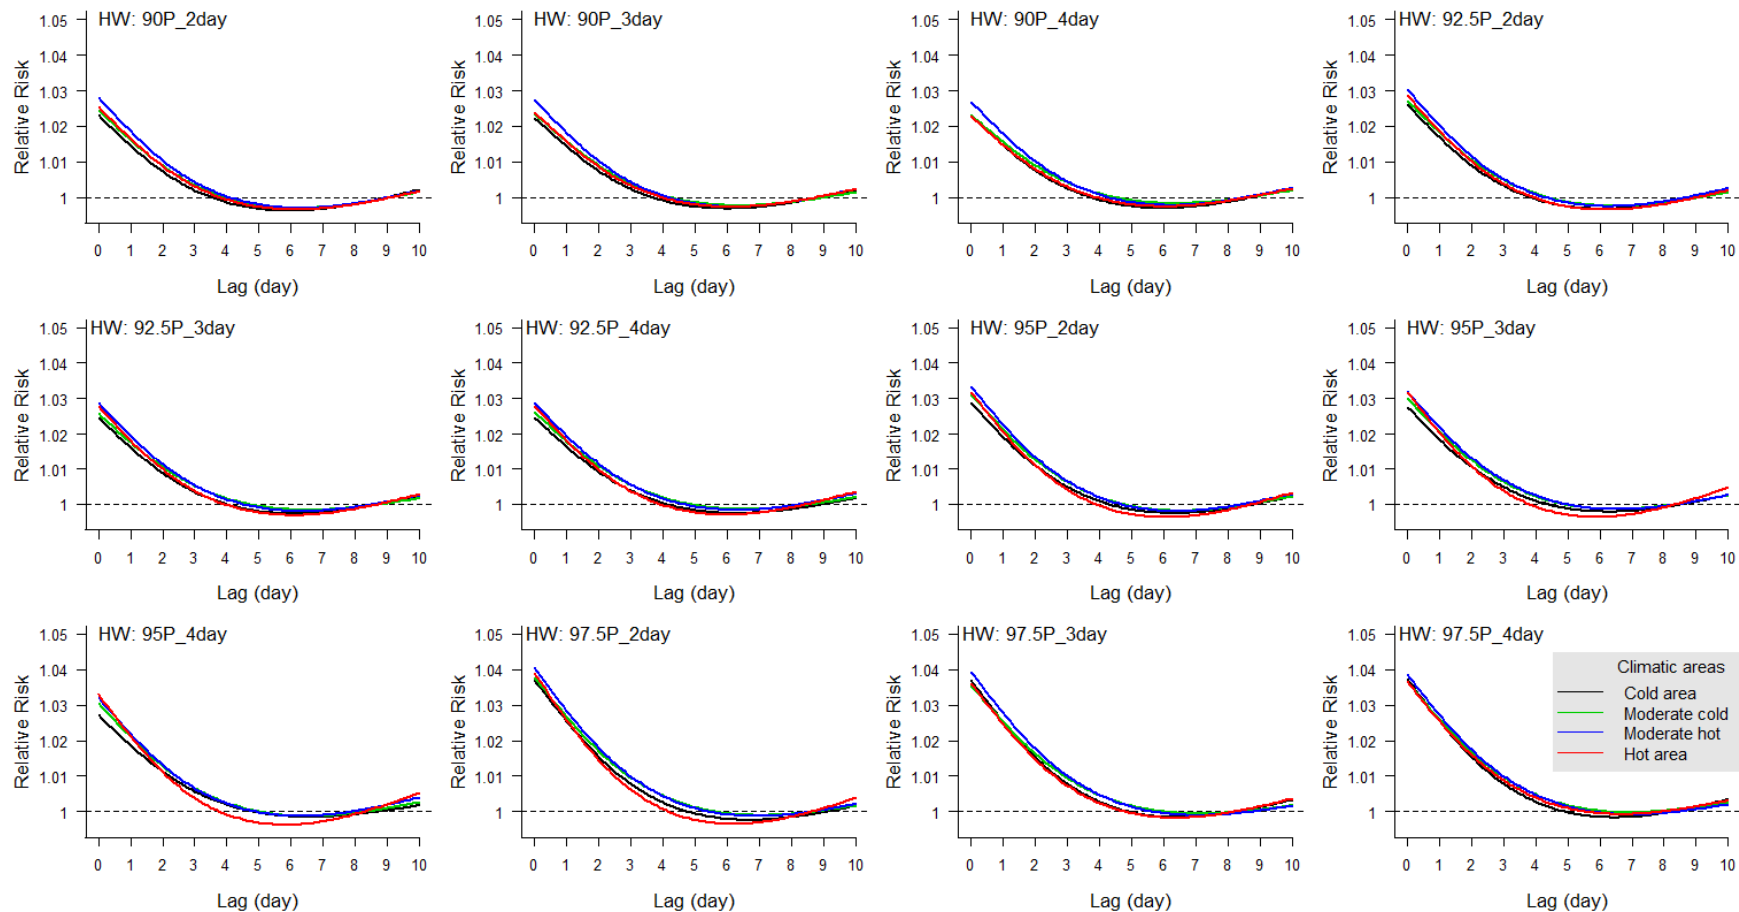

Figure S11: Lag effects of heatwaves on mortality along lag 0–10 days in 4 climatic areas (cold, moderate cold, moderate hot, and hot areas) for 12 types of heatwave definitions when excluding Moldova. Cold areas: mean temperature of hot season  $\leq 20.7$  °C; moderate cold areas: mean temperature of hot season 20.7–24.1 °C; moderate hot areas: mean temperature of hot season 24.1–27.6 °C; and hot areas: mean temperature of hot season  $> 27.6$  °C. Please refer table 1 for heatwave definitions.



### Remove Vietnam

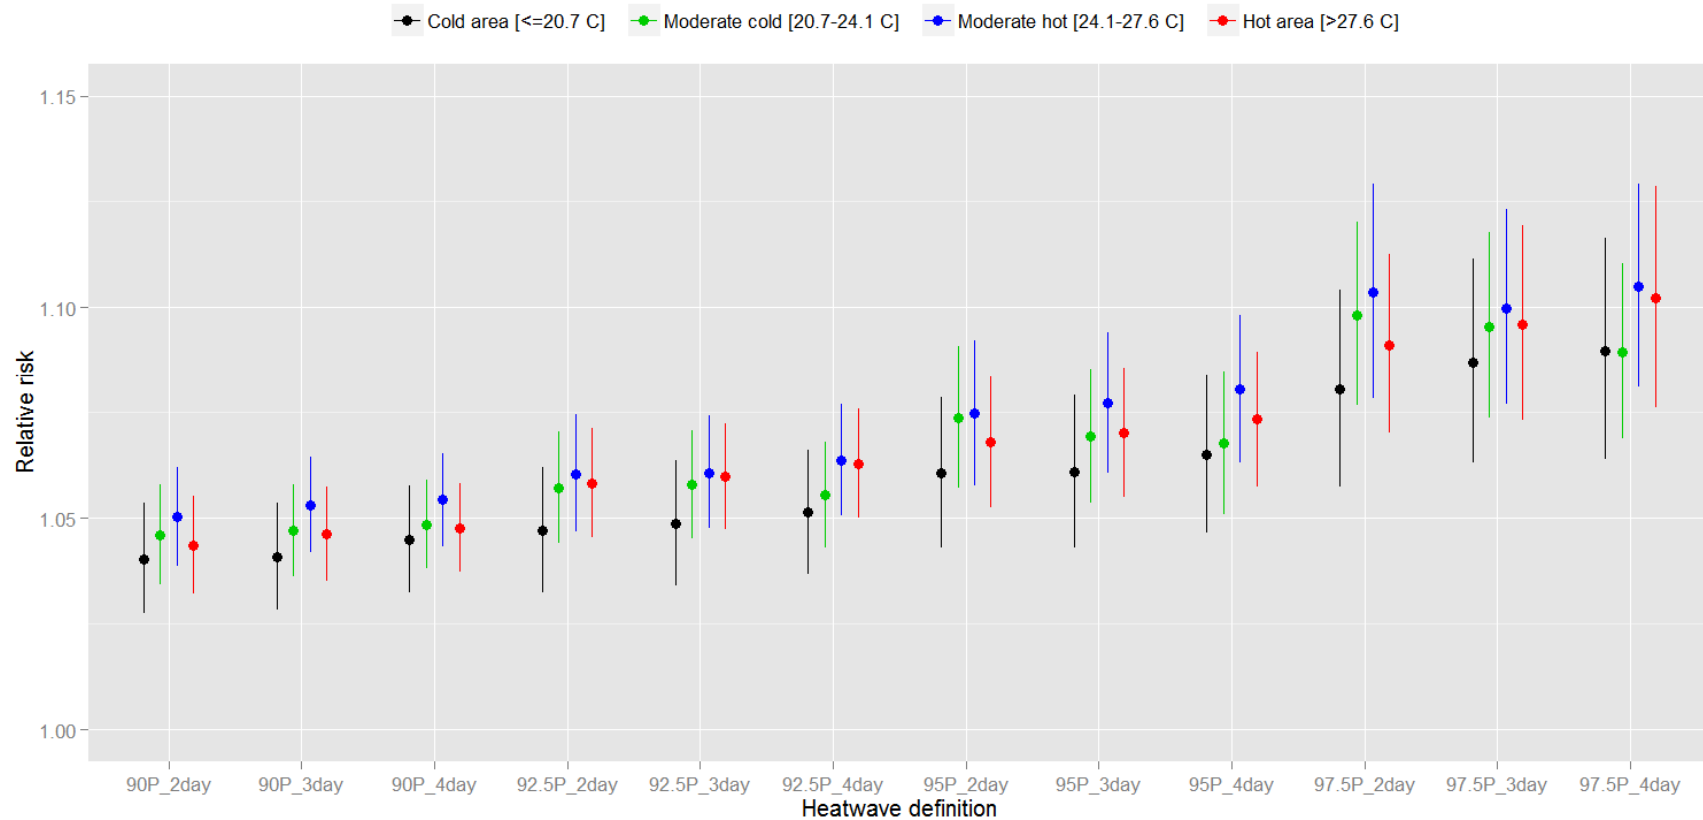

Figure S12: Cumulative effects of heatwaves on mortality over lag 0–10 days in 4 climatic areas (cold, moderate cold, moderate hot, and hot areas) for 12 types of heatwave definitions when excluding Vietnam. Cold areas: mean temperature of hot season  $\leq 20.7$  °C; moderate cold areas: mean temperature of hot season 20.7–24.1 °C; moderate hot areas: mean temperature of hot season 24.1–27.6 °C; and hot areas: mean temperature of hot season  $> 27.6$  °C. Please refer table 1 for heatwave definitions.

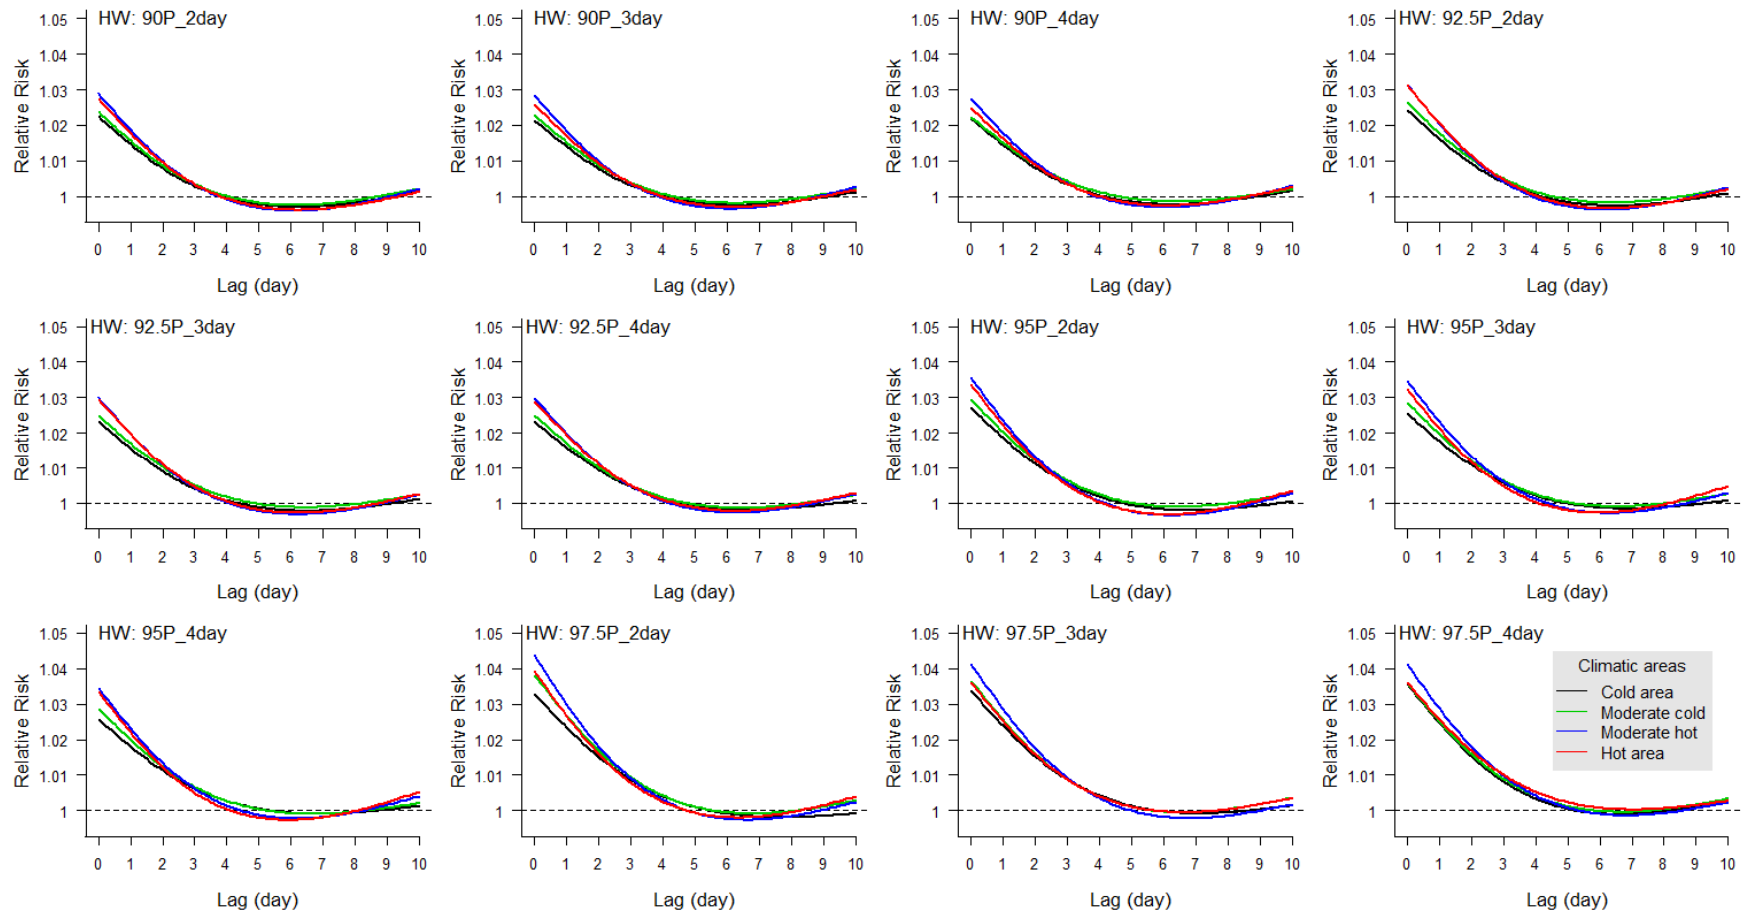

Figure S13: Lag effects of heatwaves on mortality along lag 0–10 days in 4 climatic areas (cold, moderate cold, moderate hot, and hot areas) for 12 types of heatwave definitions when excluding Vietnam. Cold areas: mean temperature of hot season  $\leq 20.7$  °C; moderate cold areas: mean temperature of hot season 20.7–24.1 °C; moderate hot areas: mean temperature of hot season 24.1–27.6 °C; and hot areas: mean temperature of hot season  $>27.6$  °C. Please refer table 1 for heatwave definitions.

### Control for temperature variability

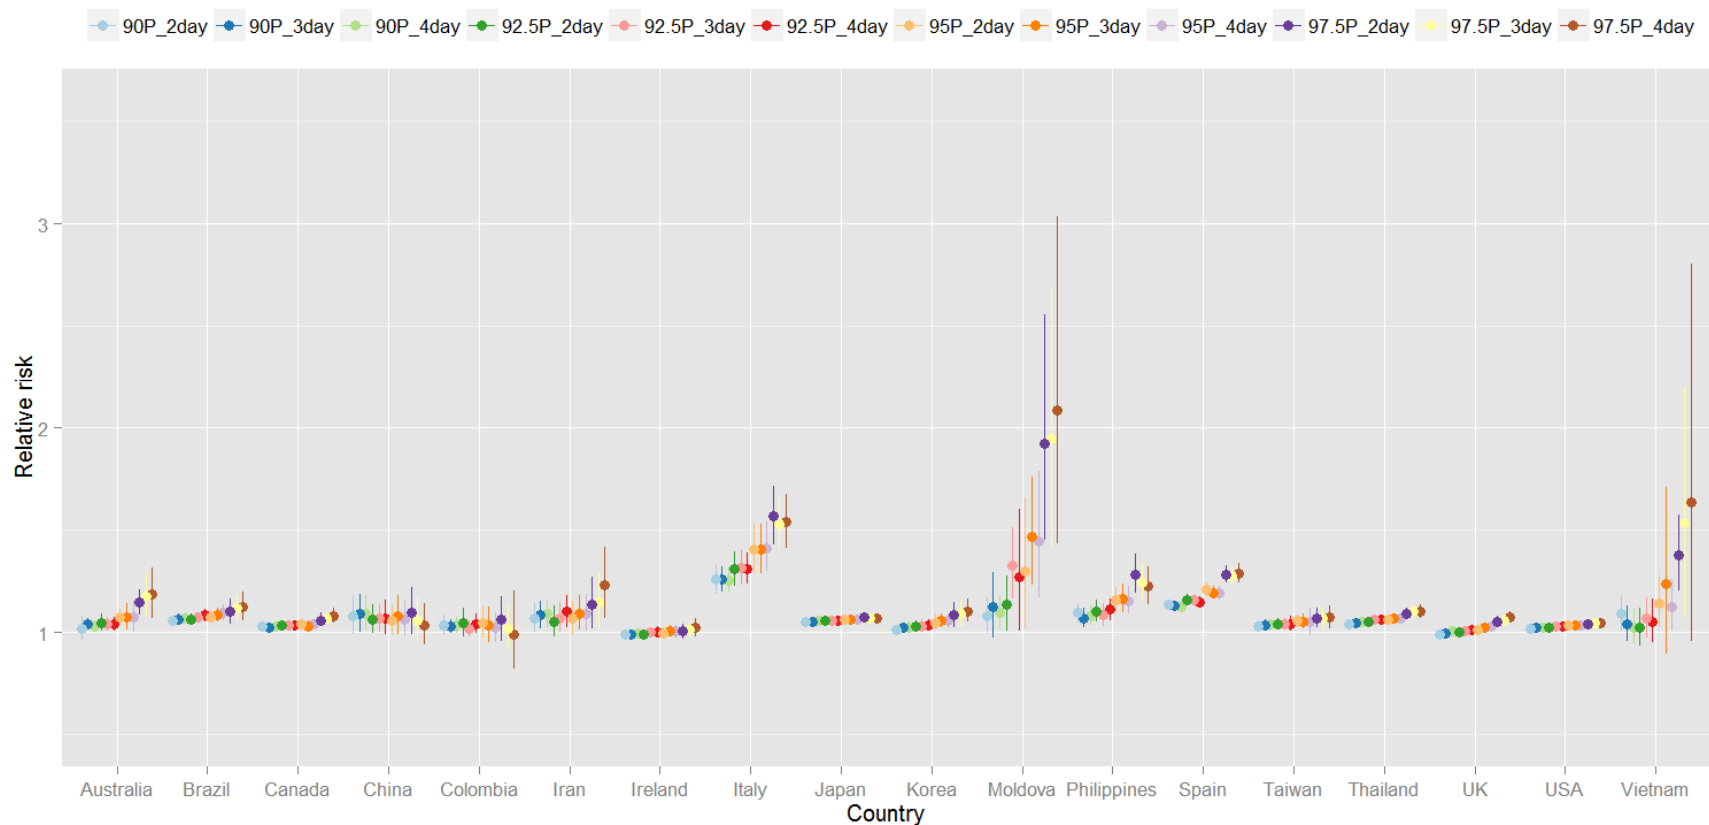

Figure S14: Cumulative effects of heatwaves on mortality over lag 0–10 days after controlling for temperature variability (standard deviation of 10 days' daily mean temperatures) in 18 countries/regions for 12 types of heatwave definitions. Please refer table 1 for heatwave definitions.
